1                    **EDA2R/NIK signaling promotes skeletal muscle atrophy linked to cancer cachexia**

2  
3                    Sevval Nur Bilgic<sup>\*,1</sup>, Aylin Domaniku<sup>\*,1</sup>, Batu Toledo<sup>1</sup>, Samet Agca<sup>1</sup>, Bahar Z. C. Weber<sup>1</sup>, Dilsad  
4                    H. Arabaci<sup>1</sup>, Zeynep Ozornek<sup>1</sup>, Pascale Lause<sup>2</sup>, Jean-Paul Thissen<sup>2,3</sup>, Audrey Loumaye<sup>2,3</sup>,  
5                    Serkan Kir<sup>†,1</sup>

6  
7                    1. Department of Molecular Biology and Genetics, Koc University, Istanbul 34450, Turkey

8                    2. Department of Endocrinology and Nutrition, Cliniques Universitaires Saint-Luc, 1200 Brussels  
9                    Belgium

10                    3. Pole of Endocrinology, Diabetology and Nutrition, Institute of Experimental and Clinical  
11                    Research, Université Catholique de Louvain, 1200 Brussels, Belgium

12  
13                    \*These authors contributed equally to this work.

14                    †Corresponding author. Tel: +90 212 338 1581. Email: [skir@ku.edu.tr](mailto:skir@ku.edu.tr).

## 31 Summary

32 **Skeletal muscle atrophy is a hallmark of the cachexia syndrome that is associated with poor**  
33 **survival and reduced quality of life in cancer patients<sup>1</sup>. Muscle atrophy involves excessive**  
34 **protein catabolism and loss of muscle mass and strength<sup>2</sup>. An effective therapy against muscle**  
35 **wasting is lacking as mechanisms driving the atrophy process remain incompletely**  
36 **understood. Our gene expression analysis in muscle tissues revealed upregulation of**  
37 **Ectodysplasin A2 Receptor (EDA2R) in tumor-bearing mice and cachectic cancer patients.**  
38 **Here we show that activation of EDA2R signaling promotes skeletal muscle atrophy.**  
39 **Stimulation of primary myotubes with EDA2R ligand, EDA-A2, triggered pronounced**  
40 **cellular atrophy via inducing the expression of muscle atrophy-related genes *Atrogin1* and**  
41 ***MuRF1*. EDA-A2-driven myotube atrophy involved activation of the noncanonical NFκB**  
42 **pathway and depended on NIK kinase activity. While EDA-A2 overexpression induced**  
43 **muscle wasting in mice, the deletion of EDA2R or muscle NIK protected tumor-bearing mice**  
44 **from the loss of muscle mass and function. Tumor-induced Oncostatin M upregulated muscle**  
45 **EDA2R expression and muscle-specific Oncostatin M Receptor (OSMR) knockout mice were**  
46 **resistant to tumor-driven muscle wasting. Our results demonstrate that EDA2R/NIK**  
47 **signaling mediates cancer-associated muscle atrophy in an OSM/OSMR-dependent manner.**  
48 **Thus, therapeutic targeting of these pathways may be beneficial in preventing muscle loss.**

49  
50 Skeletal muscle atrophy is characterized by excessive protein catabolism leading to loss of muscle  
51 mass and strength<sup>2</sup>. Muscle loss is associated with aging (i.e., sarcopenia), muscular dystrophies  
52 and the cachexia syndrome that is linked to chronic diseases such as cancer and kidney failure.  
53 Cachexia involves progressive muscle wasting that is often accompanied by the loss of adipose  
54 tissue<sup>3</sup>. Cachexia is highly prevalent in patients with lung, gastric, pancreatic or colorectal cancers  
55 where it leads to dramatic weight loss and poor quality of life. Cancer patients experiencing  
56 cachexia exhibit frailty, reduced response to treatment and poor survival<sup>1</sup>. Without an effective  
57 therapy to reverse muscle wasting, cachexia remains a major problem for the patients<sup>4</sup>. A better  
58 understanding of tumor-driven mechanisms promoting muscle atrophy is urgently needed to design  
59 new therapeutics.

60 Ectodysplasin A (EDA) is a Tumor Necrosis Factor (TNF) family member involved in ectodermal  
61 development. Mutations in the *EDA* gene have been associated with X-linked hypohidrotic  
62 ectodermal dysplasia, a congenital disease characterized by abnormalities in the development of  
63 skin, hair, nails, teeth, and sweat glands<sup>5</sup>. Alternative splicing generates numerous *EDA* transcripts,  
64 including well-known isoforms EDA-A1 and EDA-A2 which differ only by two amino acids  
65 missing in EDA-A2. While EDA-A1 binds to the EDAR receptor, EDA-A2 exclusively interacts  
66 with EDA2R<sup>6</sup>. These ligands are produced as transmembrane proteins but they are also  
67 enzymatically cleaved and secreted. Defects in *EDA* and *EDAR* genes are linked to ectodermal  
68 dysplasia<sup>7</sup>. However, the deletion of EDA2R does not affect the development of ectodermal tissues  
69 and the physiological roles of the EDA-A2/EDA2R pathway remain largely elusive<sup>8</sup>.

70 We investigated skeletal muscle wasting driven by cachexia-inducing Lewis Lung Carcinoma  
71 (LLC) and B16 melanoma tumors in the syngeneic C57BL/6 mice<sup>9,10</sup>. Our gene expression analysis

72 revealed significant upregulation of *Eda2r* mRNA in skeletal muscles of tumor-bearing mice (Fig.  
73 1a). In fact, by comparing gene expression in different tissues of mice, we identified high levels of  
74 *Eda-a1* and *Eda-a2* mRNA in skeletal muscle (Extended Data Fig. 1a,b). While *Edar* expression  
75 was the highest in the skin, *Eda2r* mRNA levels were markedly enriched in skeletal muscle  
76 (Extended Data Fig. 1c,d), arguing a potential role for EDA2R signaling in muscle  
77 pathophysiology. Testing gene expression in muscle biopsies, we detected elevated *EDA2R* mRNA  
78 in a subset of lung and colorectal cancer patients experiencing cachexia (Fig. 1b). Furthermore, our  
79 analysis of gene expression datasets indicated significantly increased *EDA2R* transcript levels in  
80 muscle biopsies of cachectic patients with pancreatic ductal adenocarcinoma (PDAC) compared to  
81 non-cachectic PDAC patients and non-cancer subjects (Fig. 1c). Similarly, muscle *EDA2R* levels  
82 were elevated in cachectic patients with upper gastrointestinal cancers (UGIC) compared to healthy  
83 controls. Upon the resection of tumors, there was a trend for reduced *EDA2R* expression in these  
84 patients (Fig. 1d and Extended Data Fig. 2a). In addition, we also detected significantly elevated  
85 *EDA2R* transcript in muscle biopsies of Duchenne muscular dystrophy (DMD) and  
86 Facioscapulohumeral muscular dystrophy (FSHD) patients who suffer from reduced muscle mass  
87 and function (Extended Data Fig. 2b-d). Intrigued by these observations, we asked whether the  
88 EDA-A2/EDA2R pathway is involved in muscle loss.

89 First, we studied the outcome of the activation of this pathway in muscle cells. For this purpose,  
90 we isolated primary myoblasts from C57BL/6 mice and differentiated them into fully mature  
91 myotube cells. Treatment of primary myotubes with recombinant EDA-A2 protein stimulated  
92 mRNA levels of muscle atrophy-related genes; *Atrogin1* (*Fbxo32*) and *MuRF1* (*Trim63*) (Fig. 1e).  
93 These genes encode E3 ubiquitin ligase enzymes that are well-recognized inducers of muscle  
94 protein breakdown<sup>2</sup>. EDA-A2 treatment promoted cellular atrophy in primary myotubes as  
95 evidenced by a reduction in the diameter of these cells (Fig. 1f,g). While primary myotubes did not  
96 respond to EDA-A1 treatment, a marginal effect on cellular atrophy was induced by TNF $\alpha$  (Fig.  
97 1f,g). Overexpression of EDA-A2 and not EDA-A1 in primary myotubes promoted mRNA levels  
98 of *Atrogin1* and *MuRF1*, and induced cellular atrophy (Extended Data Fig. 3a-c). In addition, the  
99 overexpression of EDA-A2 or the administration of recombinant EDA-A2 also induced  
100 *ATROGIN1* and *MURF1* expression in human myotubes and led to a reduction in myotube diameter  
101 (Fig. 1h,i and Extended Data Fig. 3d-f). We further documented the atrophic effects of EDA-A2 in  
102 mouse primary myotubes by measuring myosin heavy chain (MyHC) protein levels.  
103 Immunofluorescently labeled MyHC signal dropped significantly post EDA-A2 administration  
104 (Extended Data Fig 3g,h). MyHC downregulation was also detected by western blotting. Notably,  
105 proteasomal inhibition by MG132 reversed this effect, arguing that EDA-A2 promoted MyHC loss  
106 by enhancing proteasomal degradation (Extended Data Fig 3i).

107 Previous studies indicated the activation of NF $\kappa$ B signaling by EDA-A2/EDA2R<sup>11,12</sup>. Therefore,  
108 we further tested changes in mRNA and protein levels of NF $\kappa$ B factors and their I $\kappa$ B inhibitors.  
109 NF $\kappa$ B transcription factors are normally sequestered in the cytoplasm by inhibitory I $\kappa$ B proteins.  
110 The canonical NF $\kappa$ B signaling involves IKK $\beta$ -dependent phosphorylation of I $\kappa$ Bs and their  
111 degradation while the noncanonical (alternative) NF $\kappa$ B activation depends on NF $\kappa$ B-inducing  
112 kinase (NIK) which promotes the processing of p100-NF $\kappa$ B2 into the active p52-NF $\kappa$ B2 form  
113 resulting in nuclear translocation of the p52-NF $\kappa$ B2/RelB complex<sup>13</sup>. Notably, EDA-A2

114 administration or overexpression increased mRNA levels of *Nik* (*Map3k14*), *Nfkb2*, *Relb*, *Nfkbia*  
115 and *Nfkbie* in mouse primary myotubes (Fig. 1e and Extended Data Fig. 3a and 4a,b). A similar  
116 effect was also detected in human myotubes (Fig. 1h and Extended Data Fig. 3e). Compared to  
117 TNF $\alpha$ , EDA-A2 treatment in mouse primary myotubes promoted a more pronounced effect on the  
118 expression of the atrophy genes and the NF $\kappa$ B signaling elements while EDA-A1 failed to stimulate  
119 these changes (Fig. 1j). Our results demonstrate that EDA-A2 induces the atrophy of myotubes and  
120 the transcription of noncanonical NF $\kappa$ B signaling components along with high levels of I $\kappa$ Bs.

121 Next, we examined the activation of the canonical NF $\kappa$ B pathway by determining the  
122 phosphorylation of I $\kappa$ B, p105-NF $\kappa$ B and p65-RelA. Treatment of mouse primary myotubes with  
123 either EDA-A2 or TNF $\alpha$  induced the phosphorylation of these proteins acutely (Fig. 1k). We also  
124 detected an EDA-A2-induced increase in the phosphorylation of JNK, which was previously  
125 implicated in EDA2R signaling<sup>11,14</sup> (Fig. 1k). A stable change in the processing of p105-NF $\kappa$ B into  
126 p50-NF $\kappa$ B was not detected after 24 hours of treatment (Fig. 1l). Interestingly, prolonged treatment  
127 of primary myotubes with recombinant EDA-A2 promoted alternative activation of NF $\kappa$ B  
128 signaling as evidenced by increased processing of p100-NF $\kappa$ B2 into p52-NF $\kappa$ B2, a process driven  
129 by NIK<sup>13</sup>. In fact, EDA-A2 treatment elevated NIK protein levels and particularly induced an  
130 electrophoretic mobility shift of this protein (Fig. 1l,m). This shift is in part due to the  
131 phosphorylation of NIK since it can be partially suppressed by alkaline phosphatase treatment (Fig.  
132 1m). Other types of post-translational modifications likely contribute to this behavior. Wild-type  
133 mouse NIK protein overexpressed in primary myotubes also exhibited the mobility shift, unlike  
134 kinase-dead and autophosphorylation-deficient NIK mutants (Extended Data Fig. 4c). Notably,  
135 EDA-A2 treatment increased protein levels of the mutants without inducing a shift. Therefore,  
136 EDA-A2-induced mobility shift likely requires intact NIK kinase activity and depends on the  
137 autophosphorylation of the protein (Extended Data Fig. 4c). This shift was not detected for human  
138 NIK protein overexpressed in mouse primary myotubes (Extended Data Fig. 4d). In addition,  
139 overexpression of EDA-A2 in primary myotubes also activated the alternative NF $\kappa$ B signaling via  
140 NIK accumulation (Extended Data Fig. 4e). Our results indicate that EDA-A2 is a potent inducer  
141 of atrophy in myotubes where it leads to transient and stable activation of the canonical and  
142 noncanonical NF $\kappa$ B pathways, respectively.

143 To distinguish the relative contribution of NF $\kappa$ B pathways to EDA-A2-driven atrophy, we treated  
144 primary myotubes with the selective IKK $\beta$  inhibitor TPCA-1 and the proteasome inhibitor MG132.  
145 We found that EDA-A2-induced phosphorylation of I $\kappa$ B, p105-NF $\kappa$ B and p65-RelA was blocked  
146 by TPCA-1 treatment. However, inhibition of the canonical NF $\kappa$ B pathway did not suppress EDA-  
147 A2's effects on gene expression (Fig. 2a,b). We tested additional I $\kappa$ B phosphorylation inhibitors  
148 such as BAY 11-7082 and BOT-64, which also failed to block EDA-A2-induced transcriptional  
149 changes (Extended Data Fig. 5a). I $\kappa$ B phosphorylation inhibitors also did not alter p100-NF $\kappa$ B2  
150 processing driven by EDA-A2 (Fig. 2c and Extended Data Fig. 5b). On the other hand, proteasomal  
151 inhibition by MG132 was able to prevent p100-NF $\kappa$ B2 processing and the transcriptional effects  
152 elicited by EDA-A2 treatment in primary myotubes (Fig. 2a,c), consistent with an implication of  
153 the alternative NF $\kappa$ B activation at the downstream of EDA-A2 signaling.

154 Because EDA-A2 induced mRNA and protein levels of NIK, we compared it with cytokines that  
155 are known to activate NIK kinase, such as BAFF and TWEAK<sup>15</sup>. While BAFF failed to trigger an



156 effect in primary myotubes, EDA-A2 and TWEAK acted similarly as both factors stimulated the  
157 mRNA expression of the target genes, the accumulation of NIK protein and the processing of p100-  
158 NFκB2 (Fig. 2d,e). In fact, TWEAK was previously implicated in muscle atrophy<sup>16,17</sup>. Our findings  
159 suggest that both factors may utilize a similar downstream signaling mechanism in myotubes.

160 If noncanonical NFκB signaling is involved in muscle atrophy, then activation of this pathway  
161 should alone stimulate this process. For this purpose, we transduced primary myotubes with an  
162 adenovirus expressing NIK. The overexpression of NIK promoted the processing of NFκB2 and  
163 the expression of *Atrogin1*, *MuRF1* and other EDA-A2 targets (Extended Data Fig. 6a and Fig. 2f).  
164 In fact, NIK overexpression was sufficient to induce cellular atrophy in primary myotubes (Fig. 2g  
165 and Extended Data Fig. 6b). Similar effects on gene expression and cellular atrophy were also  
166 observed in human myotubes (Extended Data Fig. 6c-e). We overexpressed mutant mouse NIK  
167 isoforms in mouse primary myotubes. While the kinase-dead mutant did not elicit an effect, the  
168 autophosphorylation-deficient mutant triggered partial responses in the NFκB2 processing and  
169 target gene expression (Extended Data Fig. 6f,g).

170 We next addressed the necessity of the alternative NFκB activation for EDA-A2-driven myotube  
171 atrophy. Treatment of primary myotubes with B022, a specific NIK kinase inhibitor<sup>18,19</sup>, blocked  
172 NIK-induced NFκB2 processing and gene expression in a dose-dependent manner (Extended Data  
173 Fig. 7a,b). Combined treatment with B022 and recombinant EDA-A2 also inhibited the expression  
174 of *Atrogin1*, *MuRF1* and other EDA-A2 target genes and blunted the NFκB2 processing in primary  
175 myotubes (Fig. 3a,b). In fact, the B022 treatment also blocked the EDA-A2-induced mobility shift  
176 of NIK protein while the original NIK signal was massively enhanced possibly due to a negative  
177 feedback loop broken by the inhibition. A similar effect on NIK protein levels was also observed  
178 when EDA-A2-overexpressing primary myotubes were treated with B022 (Extended Data Fig. 7c).  
179 Furthermore, overexpression of a dominant-negative NIK form that suppressed the NIK-induced  
180 processing of NFκB2 also interfered with the upregulation of atrophy genes by EDA-A2 (Extended  
181 Data Fig. 7d-f). Upon NIK kinase inhibition, EDA-A2 was unable to stimulate atrophy in primary  
182 myotubes, indicating a major role for NIK signaling in EDA-A2-driven atrophy (Fig. 3c,d).

183 EDA-A2's potent effects on primary myotubes urged us to study its induction in muscle tissue.  
184 Previously, transgenic mice overexpressing EDA-A2 in skeletal muscle were generated. These  
185 mice exhibited profound muscle degeneration which was prevented by the deletion of EDA2R<sup>8</sup>.  
186 Here, we acutely overexpressed EDA-A2 by adenoviral delivery in the tibialis anterior (TA) muscle  
187 of mice. Within 7 days, the expression of EDA-A2 target genes, including *MuRF1*, *Nik*, *Nfkb2*, and  
188 *Relb*, were induced in TA muscles (Fig. 3e). Concomitantly, the weight of TA muscles transduced  
189 with EDA-A2 adenovirus significantly dropped while the weight of untreated gastrocnemius  
190 muscles remained similar (Fig. 3f). Hematoxylin&eosin (H&E) staining of TA muscles showed  
191 that muscle fiber cross-sectional area reduces and the frequency of fibers with small cross-sectional  
192 area increases in response to EDA-A2 overexpression (Fig. 3g-i). These results argue that EDA-  
193 A2 induction is capable of promoting muscle atrophy *in vivo*.

194 Next, we addressed the role of EDA2R/NIK signaling in tumor-driven muscle wasting. We utilized  
195 EDA2R-null (EDA2R-KO) mice which have normal body weight and lack any obvious phenotypic  
196 characteristics<sup>8</sup>. We inoculated littermate wild-type and knockout mice with LLC tumors.

197 Remarkably, muscle wasting was attenuated in EDA2R-KO mice as evidenced by the preservation  
198 of gastrocnemius and TA muscles (Fig. 4a). Accordingly, these mice had significantly higher  
199 tumor-free body weight compared to tumor-bearing wild-type mice (Extended Data Fig. 8a,b) and  
200 they also exhibited improved muscle performance measured by forelimb grip strength (Fig. 4b).  
201 Tumor weight, the expression of immune response-related genes in tumors, and plasma C-Reactive  
202 Protein (CRP) levels as an indicator of systemic inflammation were comparable between the wild-  
203 type and knockout groups (Extended Data Fig. 8b-d). We also dissected and weighed adipose tissue  
204 depots, such as epididymal and inguinal white adipose tissue and interscapular brown adipose  
205 tissue (BAT). However, a distinct effect on adipose tissue wasting was not detected (Fig. 4a).  
206 Similar results on tumor-free body weight, muscle mass and physical strength were obtained when  
207 EDA2R-KO mice were inoculated with B16 tumors (Fig. 4c,d and Extended Data Fig. 8e,f).

208 The improvements in muscle mass and function were also reflected in muscle histology. H&E  
209 staining of muscle tissue demonstrated an increase in muscle fiber cross-sectional area in tumor-  
210 bearing knockout mice compared to wild-type counterparts (Fig. 4e,f, Extended Data Fig. 8g,h).  
211 Tumor-driven enrichment of muscle fibers with a small cross-sectional area was suppressed in  
212 EDA2R-deficient mice (Fig. 4g and Extended Data Fig. 8i). We also examined changes in the  
213 expression of EDA-A2 target genes in these samples. In the absence of EDA2R, tumor-induced  
214 mRNA expression of *Atrogin1*, *MuRF1* and *Nik* was suppressed while a limited induction in *Nfkb2*  
215 and *Relb* mRNA levels was detected (Fig. 4h and Extended Data Fig. 8j-l). Furthermore, Atrogin1  
216 and MuRF1 protein levels were also reduced in the muscles of tumor-bearing EDA2R-KO mice  
217 (Fig. 4i). These findings indicate that EDA2R function is essential for tumor-driven muscle  
218 wasting.

219 To further delineate this pathway, we generated skeletal muscle-specific NIK knockout mice (Myo-  
220 NIK-KO). We confirmed that the deletion was restricted to skeletal muscle by comparing *Nik*  
221 mRNA levels in various tissues (Extended Data Fig. 9a). We then inoculated these mice with LLC  
222 tumors and studied the cachexia phenotypes. Similar to EDA2R-KO mice, Myo-NIK-KO mice  
223 were also resistant to tumor-induced weight loss (Extended Data Fig. 9b-c). The lack of NIK in  
224 muscles of tumor-bearing mice prevented muscle loss and also preserved muscle function as  
225 determined by forelimb grip strength measurements (Fig. 5a,b). A distinct effect on adipose tissue  
226 wasting was not observed (Fig. 5a). The examination of muscle histology of tumor-bearing mice  
227 also demonstrated an increase in muscle fiber cross-sectional area and a decrease in the frequency  
228 of fibers with small cross-sectional area in Myo-NIK-KO mice compared to wild-type counterparts  
229 (Fig. 5c-e). Analysis of gene expression in muscle tissues also demonstrated a reduction in tumor-  
230 induced mRNA and protein levels of Atrogin1 and MuRF1 in the knockout mice (Fig. 5f,g and  
231 Extended Data Fig. 9d). The similarities in the tumor-driven responses shared by Myo-NIK-KO  
232 and EDA2R-KO mice suggest that a common pathway involving EDA2R/NIK acts to promote  
233 muscle atrophy.

234 We also investigated how tumors upregulate *Eda2r* expression in muscle tissue. Testing various  
235 tumor-induced cytokines on primary myotubes, we observed *Eda2r* upregulation by Oncostatin M  
236 (OSM) (Fig. 6a and Extended Data Fig. 10a), an IL-6 family cytokine involved in a variety of  
237 biological processes, including muscle atrophy<sup>20,21</sup>. When overexpressed in TA muscles of mice,  
238 OSM significantly increased *Eda2r* mRNA (Fig. 6b). Analysis of blood plasma from LLC tumor-

239 bearing mice detected elevated OSM levels (Fig. 6c), implying that tumor-induced OSM may  
240 activate the EDA2R signaling in muscle tissue. In fact, treatment of mouse primary myotubes with  
241 recombinant OSM protein also stimulated the expression of *Atrogin1* and resultant cellular atrophy,  
242 indicating that OSM itself is an atrophy-inducing factor (Fig. 6d, Extended Data Fig. 10b,c). We  
243 found that combined treatment of OSM and EDA-A2 resulted in atrophy-related gene expression  
244 in primary myotubes in an additive manner. After testing changes in mRNA levels of OSM target  
245 genes; *Osmr* and *Socs3*, EDA-A2-specific targets; *MuRF1*, *Nik*, *Nfkb2* and *Relb*, and OSM/EDA-  
246 A2 common gene targets; *Atrogin1* and *Ampd3*, we detected additive effects on the expression of  
247 *Atrogin1*, *Ampd3* and *Osmr* (Fig. 6d). Combination of OSM and EDA-A2 also caused a further  
248 reduction in myotube diameter (Extended Data Fig. 10b,c). These secreted factors may operate  
249 alone or together to induce the atrophy of cultured myotubes.

250 To determine the role of OSM in EDA2R regulation and muscle wasting, we generated skeletal  
251 muscle-specific OSM receptor knockout (Myo-OSMR-KO) mice. We confirmed the depletion of  
252 OSMR in muscle fibers using immunohistochemistry (Extended Data Fig 10d). Upon LLC tumor  
253 inoculation, Myo-OSMR-KO mice were protected from weight loss and muscle wasting (Fig. 6e  
254 and Extended Data Fig. 10e,f). However, tumor-bearing knockout mice still lost adipose tissue  
255 mass (Extended Data Fig. 10g). Muscle strength assessed by forelimb grip measurements reflected  
256 the preservation of muscle mass in the knockout mice while the wild-type mice exhibited evident  
257 reduced performance (Extended Data Fig. 6f). H&E staining of gastrocnemius tissue sections  
258 indicated that tumor-bearing Myo-OSMR-KO mice had significantly wider muscle fibers than  
259 tumor-bearing controls (Extended Data Fig. 6g,h). Fibers with small cross-sectional area were  
260 enriched in the latter group (Extended Data Fig. 6i). Gene expression analysis demonstrated that  
261 tumor-induced mRNA and protein levels of Atrogin1 and MuRF1 are reduced in muscles of Myo-  
262 OSMR-KO mice compared to the wild-type counterparts (Fig. 6j,k and Extended Data Fig. 10h).  
263 Importantly, OSMR depletion also suppressed the upregulation of *Eda2r* and its downstream  
264 targets in these samples (Fig. 6j and Extended Data Fig. 10h). These findings argue that the  
265 OSM/OSMR pathway plays a major role in tumor-driven muscle wasting, including the activation  
266 of EDA2R/NIK signaling.

## 267 Discussion

268 Taken together, our findings indicate that EDA2R signaling is a potent inducer of muscle atrophy.  
269 While the EDA-A1/EDAR pathway is important for the development of ectodermal structures,  
270 EDA-A2/EDA2R signaling is involved in skeletal muscle pathophysiology<sup>8</sup>. EDA2R expression  
271 is upregulated in muscles of tumor-bearing mice and also in muscle biopsies of cachectic cancer  
272 patients. Previously, chronic activation of EDA2R signaling was shown to cause myodegeneration  
273 in EDA-A2 transgenic mice<sup>8</sup>. Our results show that EDA2R upregulation during cancer cachexia  
274 contributes to muscle loss. The canonical NFκB signaling has been shown to promote muscle  
275 protein breakdown<sup>2</sup>. This study revealed that noncanonical NFκB activation also triggers muscle  
276 atrophy in which NIK kinase plays a central role. Deletion of either EDA2R or NIK in mice was  
277 sufficient to confer resistance against tumor-induced muscle wasting. EDA2R expression is  
278 induced by inflammatory cytokines and we identified OSM as a prominent regulator. In fact, the  
279 depletion of OSMR in muscle protected from the wasting of this tissue. Our results argue that

280 OSM/OSMR signaling acts in parallel to the EDA2R/NIK pathway and reinforces muscle atrophy  
281 and EDA2R upregulation.

282 Systemic inflammation has been implicated to play a major role in cancer cachexia and pro-  
283 inflammatory cytokines TNF $\alpha$ , IL-1, and IL-6 were described as causal agents<sup>22</sup>. However, clinical  
284 trials testing anti-TNF $\alpha$  therapies failed to prevent muscle atrophy in patients with advanced cancer  
285 cachexia<sup>23,24</sup>. Although anti-IL-1 and anti-IL-6 therapies showed promising results in cachectic  
286 cancer patients, a satisfactory effect on skeletal muscle mass was not achieved<sup>25,26</sup>. An effective  
287 therapy against cachexia-associated muscle wasting is urgently needed. Our findings argue that  
288 EDA2R/NIK and OSM/OSMR pathway elements may serve as novel therapy targets. Prospective  
289 studies should test the pharmacologic inhibition of these pathways to prevent muscle wasting. The  
290 blockade of EDA2R or OSMR and the inhibition NIK kinase may be useful in reversing muscle  
291 loss. Because pathways parallel to EDA-A2/EDA2R, such as TWEAK/FN14, may also utilize NIK  
292 to promote muscle atrophy, NIK inhibition stands as a preferable choice. However, the ubiquitous  
293 expression of NIK in the body and its prominent roles in immunity may limit this strategy.  
294 Interestingly, the depletion of muscle OSMR was sufficient to both attenuate muscle loss and  
295 silence the EDA2R activation, making the OSM/OSMR pathway a potentially attractive  
296 therapeutic target.

297 EDA-A2 was previously shown to contribute to obesity-related glucose intolerance possibly  
298 through promoting insulin resistance in muscle<sup>14</sup>. Impaired glucose metabolism during cancer  
299 cachexia has also been reported<sup>27</sup>. Therefore, it is possible that the inhibition of the EDA2R/NIK  
300 pathway may improve cachexia-related abnormalities in glucose metabolism. Furthermore, our  
301 gene expression analysis demonstrated elevated *EDA2R* mRNA in the muscle biopsies of muscular  
302 dystrophy patients and *EDA2R* upregulation was also reported in muscles of aging individual<sup>28</sup>. It  
303 is likely that the role of EDA2R/NIK in muscle atrophy is not restricted to cancer cachexia and  
304 therapeutic targeting of this pathway may be beneficial in other muscle disorders.

305

## 306 **Methods**

### 307 **Reagents**

308 Recombinant proteins were purchased from R&D Systems: EDA-A1 (3944-ED), EDA-A2 (922-  
309 ED), TNF $\alpha$  (410-MT), BAFF (8876-BF), TWEAK (1237-TW), OSM (495-MO), IL-6 (406-ML)  
310 and LIF (8878-LF). Small molecule inhibitors were acquired from indicated sources: TPCA-1  
311 (abcam, ab145522), MG132 (Sigma; M8699), BAY 11-7082 (abcam, ab141228), BOT-64 (Santa  
312 Cruz; sc-222062), B022 (Aobious; AOB8699). Mouse EDA-A1 (MC208411), mouse EDA-A2  
313 (MC208415) and mouse OSM (MR226014) expression plasmids were purchased from Origene.  
314 Mouse NIK expression plasmid was purchased from Invivogen (pUNO1-mMap3k14). Wild-type  
315 human NIK and the NIK-K429/430A mutant plasmids were a gift from Prof. Michael Kracht (JLU  
316 Giessen).

317

### 318 **Mice**

319 Mice were housed in 12 hour light/dark cycles (7am-7pm) and given ad libitum access to a standard  
320 rodent chow diet and water. 8-12-week-old male mice were used in all animal experiments. Mice  
321 were kept in the Koc University Animal Research Facility in accordance with institutional policies



322 and animal care ethics guidelines. EDA2R-KO and NIK-floxed mice were generated by  
323 Genentech<sup>8,29</sup>. NIK-floxed mice were a gift from Prof. Shao-Cong Sun (MD Anderson Cancer  
324 Center). Myo-NIK-KO mice were generated by crossing NIK-floxed and ACTA1-Cre mice  
325 (Jackson strain #006149). OSMR-floxed mice (strain #011081) were purchased from Jackson  
326 laboratory. Myo-OSMR-KO mice were generated by crossing OSMR flox and ACTA1-Cre mice  
327 (Jackson strain #006149). All mice were maintained on a pure C57BL/6 background. Plasma CRP  
328 levels were measured using an ELISA assay (BT Lab E0218Mo). All animal protocols were  
329 approved by the Institutional Animal Care and Use Committee of Koc University.

330

### 331 **Tumor inoculation**

332 LLC and B16 (B16-F10) cells were cultured in DMEM medium (Sigma 5796) with 10% Fetal  
333 Bovine Serum (FBS) and penicillin/streptomycin (Invitrogen). B16 cells were also supplemented  
334 with freshly added 2 mM L-glutamine (Invitrogen). Mice were divided into groups randomly while  
335 satisfying the criteria that the average body weight in each group is similar. All mice used in tumor  
336 inoculation experiments including the transgenic lines were from C57BL/6 background. LLC cells  
337 ( $5 \times 10^6$  per mouse) or B16 ( $2.5 \times 10^6$  per mouse) cells were injected subcutaneously over the  
338 flank. Non-tumor-bearing control mice received the vehicle (PBS) only. Mice were housed  
339 individually in all tumor inoculation experiments. Mice were sacrificed 16 days (LLC) or 14 days  
340 (B16) post tumor inoculation. Epididymal, inguinal and interscapular fat depots, gastrocnemius  
341 and tibialis anterior muscles and tumors were dissected and weighed using an analytical balance.

342

### 343 **Grip strength**

344 Forelimb grip strength was measured on the same day as the sacrifice. Each mouse was allowed to  
345 grab a bar attached to a force transducer while the mouse was steadily pulled by the tail horizontally  
346 away from the bar (Ugo Basile grip strength meter). The maximum strength produced before  
347 releasing the bar registered from at least 3 repetitions was averaged to determine the grip strength  
348 of each mouse.

349

### 350 **Tissue histology**

351 Isopentane was cooled by liquid nitrogen until 2/3 is frozen. Muscle samples wrapped in aluminum  
352 foil were placed in the cooled isopentane for 15-20 seconds. Frozen tissues were embedded in  
353 Tissue-Tek OCT freezing medium (Sakura) in cryomolds. Using a cryostat, 8  $\mu$ m thick sections  
354 were cut and collected on Superfrost Plus slides (Thermo). Sections were fixed with 4%  
355 paraformaldehyde and treated with hematoxylin (Merck 105174), 0.1% HCl, eosin (Merck  
356 109844), 70-100% ethanol gradient and xylene (Isolab), respectively. Muscle fiber cross-sectional  
357 area was measured using Image J software.

358

### 359 **Immunohistochemistry**

360 5  $\mu$ m thick cryosections were fixed with neutral buffer formalin and then incubated with 0.3%  
361 hydrogen peroxide for 10 min to block endogenous peroxidase activity. Sections were incubated  
362 in blocking solution (3% bovine serum albumin + 0.1% Triton X-100 + 5% Horse serum) at room  
363 temperature for 1hr and then with anti-OSMR beta (R&D Systems, AF662) antibody (10  $\mu$ g/ml)  
364 in blocking solution overnight at +4°C. Sections were washed with PBS and incubated in the  
365 blocking solution containing anti-goat IgG H&L HRP-conjugated secondary antibody (1:1000)  
366 (Abcam, ab6885) for 1hr. Finally, the sections were stained with diaminobenzidine (DAB; Abcam,  
367 ab64238,) and counterstained with hematoxylin (Merck 105174).

368



### 369 **Adenovirus production and injection**

370 Adenovirus vectors were generated using the Virapower Adenoviral expression system  
371 (Invitrogen). Briefly, open reading frames of the genes following a CACC sequence were cloned  
372 into a pENTR-D-TOPO plasmid and then recombined into a pAd-CMV-DEST adenoviral plasmid  
373 using LR clonase II. PacI (Thermo) digested adenoviral plasmids were transfected into 293A cells  
374 using Lipofectamine 2000 (Invitrogen). 293A cells were cultured in DMEM (Sigma 5796), 10%  
375 FBS (Invitrogen) and penicillin/streptomycin (Invitrogen). Adenoviral particles were collected  
376 from cell culture supernatant following the manufacturer's instructions. For purification and  
377 titration, Adeno-X Maxi Purification Kit and Adeno-X Rapid Titer Kit from Clontech were used.  
378 Mice were injected unilaterally with  $5 \times 10^8$  ifu (infectious units) of Adeno-EDA-A2 or Adeno-  
379 OSM into the tibialis anterior muscle while the contralateral muscle received the same dose of  
380 control Adeno-LacZ. Mice were sacrificed 7 days later.

381

### 382 **Site-directed mutagenesis**

383 Mouse NIK coding sequence in the pENTR shuttle plasmid was mutated using Phusion high  
384 fidelity polymerase (NEB) and oligonucleotides designed to carry the desired mutations (indicated  
385 by lowercase letters): mNIK-T561A F: 5'- CTACATTCCTGGCgCGGAGACCCACATG-3', R:  
386 5'- CATGTGGGTCTCCGcGCCAGGAATGTAG-3'. mNIK-K431A-K432A 5'-  
387 GCTTCCAGTGTGCTGTCgcAgcGGTACGACTCGAGGTG-3' R: 5'-  
388 CACCTCGAGTCGTACCgcTgcGACAGCACTGGAAGC-3'. Mutated coding sequences  
389 were recombined into the adenoviral plasmid for adenovirus production as described above.

390

### 391 **Myoblast culture**

392 Primary myoblasts were isolated from limb muscles of mice (2-3 days old) as described before<sup>30</sup>.  
393 Myoblasts were cultured in Ham's F-10 nutrient mixture (Invitrogen) with 20% FBS (Invitrogen)  
394 supplemented with 2.5 ng/ml basic fibroblast growth factor (bFGF) (Sigma) and  
395 penicillin/streptomycin (Invitrogen). For differentiation, myoblasts were then transferred to  
396 DMEM (Sigma 5796) supplemented with horse serum (HS) and penicillin/streptomycin  
397 (Invitrogen). Myotube cells were differentiated in 2% HS for 48 hours for protein isolation and  
398 they were differentiated in 5% HS for 72 hours for gene expression and imaging experiments.  
399 Adeno-GFP was added to the cells at the start of differentiation for fluorescent myotube imaging  
400 performed using a live cell imager (Zeiss Axiolab live cell imager). Cells were treated with other  
401 adenoviruses after differentiation for 24-48 hr. Human Skeletal Muscle Myoblasts (HSMM; Lonza)  
402 were cultured in DMEM/F12-glutamax (Invitrogen) with 20% FBS (Invitrogen) supplemented  
403 with 5 ng/ml bFGF (Sigma). Cells were differentiated in DMEM/F12-glutamax with 5% HS for  
404 72 hours. Human myotubes were treated with recombinant proteins or adenoviruses for 48 hr. The  
405 diameters of individual myotubes were measured using Image J software. Each myotube was  
406 measured at 3 different sites and the values were averaged.

407

### 408 **Immunofluorescence**

409 Cells were fixed with ice-cold 100% methanol at -20°C for 10 min, incubated in a blocking solution  
410 (3% bovine serum albumin + 0.1% Triton X-100 + 10% Horse serum) at room temperature for 1hr  
411 and then incubated with myosin heavy chain (MyHC) antibody (1:1000) (DSHB, MF20) in the  
412 blocking solution for 1 hr at room temperature. Cells were washed with PBS and incubated with  
413 anti-mouse IgG H&L Alexa Fluor 594 secondary antibody (1:2000) (Abcam, ab150116) and DAPI  
414 (1:3000) (Cayman, 14285) in the blocking solution for 1hr and mounted using homemade mounting

415 medium. Cells were visualized using fluorescence microscopy (Zeiss). MyHC signal was  
416 normalized to the number of myotube nuclei. Fields with similar density of myotubes were chosen.  
417

#### 418 **Western blotting**

419 Cells were homogenized in a cell lysis buffer containing 50 mM Tris (pH 7.4), 150 mM NaCl, 1%  
420 Triton X-100, 5 mM EDTA, 1 mM PMSF, supplemented with protease inhibitor tablets (Roche)  
421 and phosphatase inhibitors; 20 mM NaF, 10 mM  $\beta$ -glycerol phosphate, 10 mM  $\text{Na}_4\text{P}_2\text{O}_7$ , 2 mM  
422  $\text{Na}_3\text{VO}_4$ . A similar lysis buffer was used for tissue samples where 1% NP40 was used as the  
423 detergent and 10% glycerol was added. Tissues were homogenized using a Kinematica (PT1200E)  
424 homogenizer. The homogenates were centrifuged at 13,000 rpm for 10 min and the supernatants  
425 were used as lysates. Protein concentration was determined by Bio-Rad Protein assay and 30  $\mu\text{g}$  of  
426 protein lysate was used in each SDS-PAGE run. For the detection of endogenous NIK protein and  
427 its mobility shift, 90  $\mu\text{g}$  of protein lysate was loaded. Nitrocellulose membrane was blotted with  
428 primary antibodies in TBS containing 0.05% Tween and 5% BSA (Cell signaling; p65-RelA  
429 (8242), phospho-p65-RelA-Ser536 (3033), p105/p50-NF $\kappa$ B (12540), phospho-p105-NF $\kappa$ B-  
430 Ser932 (4806), p100/p52-NF $\kappa$ B2 (4882), I $\kappa$ B (4814), phospho-I $\kappa$ B-Ser32 (2859), NIK (4994),  
431 JNK (9252), phospho-JNK-Thr183/Tyr185 (4668), anti-Flag/DYKDDDDK (2368), ECM  
432 Bioscience; Atrogin1 (AP2041), MuRF1 (MP3401), and DSHB; MyHC antibody (MF20)). For  
433 secondary antibody incubation, TBS-T containing 5% milk was used (Cell signaling anti-rabbit  
434 (7074), anti-mouse (7076)). WesternBright blotting substrates from Advansta were used for  
435 visualization of the results on a Chemidoc imaging system (Bio-rad). For blots visualized with a  
436 Licor Odyssey CLx imaging system, IRDye 680RD anti-mouse (926-68070) and IRDye 800CW  
437 anti-rabbit (926-32211) secondary antibodies were used.  
438

#### 439 **In vitro phosphatase assay**

440 A cell lysis buffer similar to the recipe described above but lacking EDTA and phosphatase  
441 inhibitors was used to collect cells. The protein concentration of the homogenate supernatants was  
442 determined by Bio-Rad Protein assay. 90  $\mu\text{g}$  of lysate was mixed with or without alkaline  
443 phosphatase (0.1U/ $\mu\text{g}$  lysate) and its buffer (Thermo) and incubated at 37°C for 1 hour. Samples  
444 were run on SDS-PAGE and processed as described above.  
445

#### 446 **RT-qPCR**

447 Total RNA from cultured cells or tissue samples was extracted using Qiazol reagent (Qiagen) and  
448 purified with RNA spin columns (Ecotech). Tissues were homogenized using TissueLyzer LT  
449 (Qiagen). Complementary DNA synthesis was carried out with a High-Capacity cDNA Reverse  
450 Transcription kit (Thermo). The resultant cDNA was analyzed by RT-qPCR using a CFX Connect  
451 instrument (Bio-Rad). In each reaction, 25 ng of cDNA and 150 nmol of each primer were mixed  
452 with iTaq Universal SYBR Green Supermix (Bio-Rad). Relative mRNA levels were calculated by  
453 the  $\Delta\Delta\text{Ct}$  method and normalized to cyclophilin mRNA. The following primers were used: *Cyclo*  
454 F: 5'-GGAGATGGCACAGGAGGAA-3', R: 5'-GCCCGTAGTGCTTCAGCTT-3'. *Atrogin1* F:  
455 5'-TCAGAGAGGCAGATTCGCAA-3', R: 5'-GGGTGACCCCATAGTCTCT-3'. *MuRF1* F: 5'-  
456 TCCTGATGGAACGCTATGGAG-3', R: 5'-ATTCGCAGCCTGGAAGATGT-3'. *Eda2r* F: 5'-  
457 TCCCCTCTACTGGACCTGAA-3', R: 5'-TGAAAGAGACCTTTCTAGTTCACCT-3'. *Eda2r*-  
458 KO F: 5'-CAGGACCAAGAATGCATCCCA-3', R: 5'-GCTCAACTGGAAGGTACTACTGAA-3'.  
459 *Eda-a2* F: 5'-TCAAAAATGATCTTTCAGGTGGAG-3', R: 5'-  
460 TGAAGTTGATGTAGTAGACCTG-3'. *Edar* F: 5'-TTGTTGAAGGTCTCAGCCCC-3', R: 5'-  
461 TTTTCACGACCGCCTTCTCA-3'. *Eda-a1* F: 5'-TCTTTCAGGTGGAGTGCTCA-3', R: 5'-

462 TGAAGTTGATGTAGTAGACTTCTAC-3'. *Nik* F: 5'-CGAGCTACTTCAACGGGGTC-3', R:  
463 5'-GGCAATGTCTCCCACCTTGA-3'. *Nik-KO* F: 5'-TGTTCTGTGGGAAGTGGGAG-3', R: 5'-  
464 CTCTTGGCTATTCTCACATTGAGC-3'. *Nfkb1* F: 5'-CTGAACAATGCCTTCCGGCT-3', R:  
465 5'- TGGTACCCCCAGAGACCTCAT-3'. *Nfkb2* F: 5'-CCTTCGTAGTTACAAGCTGGC-3', R:  
466 5'-GGCACTGTCTTCTTTCACCT-3'. *Nfkbia* F: 5'-TAGCAGTCTTGACGCAGACC-3', R: 5'-  
467 CGTGTGGCCATTGTAGTTGG-3'. *Nfkbib* F: 5'-ACCTCAATAAACCGGAGCCTAC-3', R: 5'-  
468 CACCGGCTTTCAGGAGAAGTT-3'. *Nfkbid* F: 5'-CAGTCATACAAGCCAGGAGAT-3', R: 5'-  
469 TCATATTAACAAAGGCCCGCA-3'. *Nfkbie* F: 5'-GACATTGATGTACAGGAGGGCA-3', R:  
470 5'-GGTGTGCACCCGTTAAGCAT-3'. *Nfkbiz* F: 5'-CAGTGGAGGCAAAGGATCGTA-3', R:  
471 5'-GGCAACTCCAAAAGAGGCG-3'. *Rela* F: 5'-GATCGCCACCGGATTGAAGA-3', R: 5'-  
472 GGGGTTTCAGTTGGTCCATTG-3'. *Relb* F: 5'-TTCAAACGCCACCCTACGA-3', R: 5'-  
473 ACACCGTAGCTGTCATGATCC-3'. *Relc* F: 5'-ATTTATGACAACCGTGCCCCA-3', R: 5'-  
474 CCCTGACACTTCCACAGTTCT-3'. *Ampd3* F: 5'-CTCCTCTCAGCAACAACAGCC-3', R: 5'-  
475 CTCCATGAGCGCTTCCCTTGTG-3'. *Osmr* F: 5'-GGTCCTTCATCCAGCCTTCC-3', R: 5'-  
476 GCTCCTCCAAGACTTCGCTT-3'. *Socs3* F: 5'-TAGACTTCACGGCTGCCAAC-3', R: 5'-  
477 CGGGGAGCTAGTCCCGAA-3'. *Tnfa* F: 5'-CCACCACGCTCTTCTGTCTA-3', R: 5'-  
478 CCATTTGGGAACTTCTCATCCC-3'. *Il6* F: 5'-CACTTCACAAGTCGGAGGCT-3', R: 5'-  
479 TGCCATTGCACAACCTTTTCT-3'. *Ifng* F: 5'-CTTCAGCAACAGCAAGGCG-3', R: 5'-  
480 CTGTGGGTTGTTGACCTCAAAC-3'. *Il1b* F: 5'-AAGGAGAACCAAGCAACGACA-3', R:  
481 5'-TTGGGATCCACACTCTCCAGC-3'. *Il10* F: 5'-GTAGAAGTGATGCCCCAGGC-3', R: 5'-  
482 GGGGAGAAATCGATGACAGC-3'. *Ccl2* F: 5'-CACTCACCTGCTGCTACTCA-3', R: 5'-  
483 GCTTGGTGACAAAACACTACAGC-3'. *Ccl5* F: 5'-TGCCCACGTCAAGGAGTATT-3', R: 5'-  
484 TTCGAGTGACAAACACGACTG-3'. *F4/80* F: 5'-CTTCTGGGGAGCTTACGATGG-3', R: 5'-  
485 GGCCAAGGCAAGACATACCA-3'. *Cd68* F: 5'-ACTTCGGGCCATGTTTCTCT-3', R: 5'-  
486 GGGGCTGGTAGGTTGATTGT-3'. *Nos2* F: 5'-CAGGAGATGGTCCGCAAGAG-3', R: 5'-  
487 GTCCTGAACGTAGACCTTGGG-3'. *Arg1* F: 5'-CGTAGACCCTGGGGAACTAT-3', R: 5'-  
488 TCCATCACCTTGCCAATCCC-3'. *Cd163* F: 5'-GTGTTCCGAAGGACAGGTGG-3', R: 5'-  
489 AAGCTGGCCACTTGCTATGC-3'. *Cd19* F: 5'-GAAGCATCCTCGCTTGGGTC-3', R: 5'-  
490 ACTGGGACCGGACTGAATTG-3'. *Cd3e* F: 5'-TGTATCACTCTGGGCTTGCTG-3', R: 5'-  
491 CTCCTTGTGTTTGGCCCTCTGGG-3'. *hCYCLO* F: 5'-GGAGATGGCACAGGAGGAA-3', R: 5'-  
492 GCCCGTAGTGCTTTCAGTTT-3'. *hNIK* F: 5'-GGGACGTCAAAGCTGACAAC-3', R: 5'-  
493 GACACACAGCATGGCCAAAG-3'. *hEDA2R* F: 5'-TGCTCCTATACTGGAGCTGA-3', R: 5'-  
494 GGGGCCCAAGAGACCTCATTA-3'. *hATROGIN1* F: 5'-AGGAAGTACTAAAGAGGCCA-  
495 3', R: 5'-GCAGGCCGGACCACGTA-3'. *hMURF1* F: 5'-GCCCCATTGCAGAGTGTCTT-3', R:  
496 5'-ACTGTTCTCCTTGGTCACTCG-3'. *hNFKB2* F: 5'-TCTGCAACTGAAACGCAAGC-3', R:  
497 5'-CCTCTTCTTGTCTTCCACCA-3'. *hRELB* F: 5'-CTCGCGACCATGACAGCTAC-3', R: 5'-  
498 GGCTTTTTCTTCCGCCGTTT-3'.

499  
500 **Human gene expression analysis**  
501 Patients were enrolled in the ACTICA study, a cross-sectional study aimed at assessing cachexia  
502 in patients diagnosed with colorectal or lung cancer. The study was performed at the Cliniques  
503 Universitaires Saint-Luc, Brussels, Belgium from January 2012 to March 2014. The study protocol  
504 was approved by the local ethical committee of the Université Catholique de Louvain (protocole  
505 code: 2011/19AVR/157, approved on the 9 May 2011) and written consent was given prior to entry  
506 into the study. The inclusion and exclusion criteria have been precisely described previously in the  
507 original paper<sup>31</sup>. Cachexia was defined, according to the definition proposed by Fearon et al<sup>32</sup>, as  
508 an involuntary weight loss >5 % over the past 6 months or weight loss >2% and BMI <20 kg/m<sup>2</sup>

509 or weight loss >2% and low muscularity. Among 152 patients enrolled in the study, a skeletal  
510 muscle microbiopsy was performed in 35 patients under general anesthesia, just before the surgery  
511 for cancer and before any other therapeutic intervention. The microbiopsies were taken from the  
512 vastus lateralis of the quadriceps, with a 14 Gauge true-cut biopsy needle (Bard Magnum Biopsy  
513 gun; Bard, Inc.). The muscle samples were cleaned of gross blood contamination and fat or fibrous  
514 tissue prior to being frozen in liquid nitrogen and stored at  $-80^{\circ}\text{C}$  until RNA extraction. Total RNA  
515 was extracted from frozen muscle samples using TriPure Isolation Reagent (Roche Diagnostics,  
516 Basel, Switzerland), as described by the manufacturer. Reverse transcription was performed as  
517 previously described by Gueugneau et al<sup>33</sup>.

518 Gene expression profiles of rectus abdominis muscle biopsies from cachectic and non-cachectic  
519 pancreatic ductal adenocarcinoma patients and non-cancer subjects were accessed from Gene  
520 Expression Omnibus (GEO) database with the GSE130563 accession number<sup>34</sup>. Differential gene  
521 expression analysis was performed by GEO2R with default settings. One sample from GSE130563  
522 was identified as an outlier (GSM3743567) for EDA2R expression according to Grubbs' test  
523 ( $\text{Alpha} = 0.0001$ ) and excluded from the analysis. Gene expression profiles of quadriceps muscle  
524 biopsies collected from non-cancer subjects and cachectic patients with upper gastrointestinal  
525 cancer before and after the tumor resection were accessed from the GEO database (accession  
526 number: GSE34111)<sup>35</sup> and analyzed by GEO2R using default settings. Gene expression profiles of  
527 skeletal muscles samples from DMD patients and normal subjects were accessed with the GSE1007  
528 accession number<sup>36</sup>. Samples grouped as DMD and Normal were analyzed by GEO2R using  
529 default settings. RNA sequencing results of muscle biopsy samples from FSHD subjects were also  
530 accessed from the GEO database (accession number: GSE115650)<sup>37</sup>. 1-year follow-up gene  
531 expression assessment of muscle biopsies from the same patients was also analyzed (accession  
532 number: GSE140261)<sup>38</sup>. Gene counts normalization and fold change calculations were performed  
533 using the DEseq2 (v1.34.0) R package.

534

## 535 **Statistical Analysis**

536 Values are expressed as mean  $\pm$  SEM. Error bars (SEM) shown in all results were derived from  
537 biological replicates. Significant differences between two groups were evaluated using a two-  
538 tailed, unpaired *t*-test. Comparisons of more than two groups were performed using one-way or  
539 two-way ANOVA and corrected for multiple comparisons using Tukey's post-hoc test. Values of  
540  $p < 0.05$  were considered statistically significant. Exact *p*-values and the type of statistical test used  
541 in each experiment can be found in the Figure legends.

542

## 543 **References**

- 544 1 Baracos, V. E., Martin, L., Korc, M., Guttridge, D. C. & Fearon, K. C. H. Cancer-  
545 associated cachexia. *Nat Rev Dis Primers* **4**, 17105, doi:10.1038/nrdp.2017.105 (2018).
- 546 2 Cohen, S., Nathan, J. A. & Goldberg, A. L. Muscle wasting in disease: molecular  
547 mechanisms and promising therapies. *Nature reviews. Drug discovery* **14**, 58-74,  
548 doi:10.1038/nrd4467 (2015).
- 549 3 Argiles, J. M., Stemmler, B., Lopez-Soriano, F. J. & Busquets, S. Inter-tissue  
550 communication in cancer cachexia. *Nat Rev Endocrinol* **15**, 9-20, doi:10.1038/s41574-  
551 018-0123-0 (2018).



- 552 4 Dolly, A., Dumas, J. F. & Servais, S. Cancer cachexia and skeletal muscle atrophy in  
553 clinical studies: what do we really know? *J Cachexia Sarcopenia Muscle* **11**, 1413-1428,  
554 doi:10.1002/jcsm.12633 (2020).
- 555 5 Kowalczyk-Quintas, C. & Schneider, P. Ectodysplasin A (EDA) - EDA receptor  
556 signalling and its pharmacological modulation. *Cytokine Growth Factor Rev* **25**, 195-203,  
557 doi:10.1016/j.cytogfr.2014.01.004 (2014).
- 558 6 Yan, M. *et al.* Two-amino acid molecular switch in an epithelial morphogen that regulates  
559 binding to two distinct receptors. *Science* **290**, 523-527 (2000).
- 560 7 Sadier, A., Viriot, L., Pantalacci, S. & Laudet, V. The ectodysplasin pathway: from  
561 diseases to adaptations. *Trends Genet* **30**, 24-31, doi:10.1016/j.tig.2013.08.006 (2014).
- 562 8 Newton, K., French, D. M., Yan, M., Frantz, G. D. & Dixit, V. M. Myodegeneration in  
563 EDA-A2 transgenic mice is prevented by XEDAR deficiency. *Mol Cell Biol* **24**, 1608-  
564 1613 (2004).
- 565 9 Das, S. K. *et al.* Adipose triglyceride lipase contributes to cancer-associated cachexia.  
566 *Science* **333**, 233-238, doi:10.1126/science.1198973 (2011).
- 567 10 Kir, S. *et al.* Tumour-derived PTH-related protein triggers adipose tissue browning and  
568 cancer cachexia. *Nature* **513**, 100-104, doi:10.1038/nature13528 (2014).
- 569 11 Sinha, S. K., Zachariah, S., Quinones, H. I., Shindo, M. & Chaudhary, P. M. Role of  
570 TRAF3 and -6 in the activation of the NF-kappa B and JNK pathways by X-linked  
571 ectodermal dysplasia receptor. *The Journal of biological chemistry* **277**, 44953-44961,  
572 doi:10.1074/jbc.M207923200 (2002).
- 573 12 Verhelst, K. *et al.* XEDAR activates the non-canonical NF-kappaB pathway. *Biochem*  
574 *Biophys Res Commun* **465**, 275-280, doi:10.1016/j.bbrc.2015.08.019 (2015).
- 575 13 Liu, T., Zhang, L., Joo, D. & Sun, S. C. NF-kappaB signaling in inflammation. *Signal*  
576 *Transduct Target Ther* **2**, doi:10.1038/sigtrans.2017.23 (2017).
- 577 14 Awazawa, M. *et al.* A microRNA screen reveals that elevated hepatic ectodysplasin A  
578 expression contributes to obesity-induced insulin resistance in skeletal muscle. *Nature*  
579 *medicine* **23**, 1466-1473, doi:10.1038/nm.4420 (2017).
- 580 15 Valino-Rivas, L. *et al.* NIK as a Druggable Mediator of Tissue Injury. *Trends Mol Med*  
581 **25**, 341-360, doi:10.1016/j.molmed.2019.02.005 (2019).
- 582 16 Dogra, C. *et al.* TNF-related weak inducer of apoptosis (TWEAK) is a potent skeletal  
583 muscle-wasting cytokine. *FASEB J* **21**, 1857-1869, doi:10.1096/fj.06-7537com (2007).
- 584 17 Johnston, A. J. *et al.* Targeting of Fn14 Prevents Cancer-Induced Cachexia and Prolongs  
585 Survival. *Cell* **162**, 1365-1378, doi:10.1016/j.cell.2015.08.031 (2015).
- 586 18 Ren, X. *et al.* A small-molecule inhibitor of NF-kappaB-inducing kinase (NIK) protects  
587 liver from toxin-induced inflammation, oxidative stress, and injury. *FASEB J* **31**, 711-  
588 718, doi:10.1096/fj.201600840R (2017).
- 589 19 Li, X. *et al.* Activation of NF-kappaB-Inducing Kinase in Islet beta Cells Causes beta Cell  
590 Failure and Diabetes. *Mol Ther* **28**, 2430-2441, doi:10.1016/j.ymthe.2020.07.016 (2020).
- 591 20 Richards, C. D. The enigmatic cytokine oncostatin m and roles in disease. *ISRN*  
592 *inflammation* **2013**, 512103, doi:10.1155/2013/512103 (2013).
- 593 21 Miki, Y. *et al.* Oncostatin M induces C2C12 myotube atrophy by modulating muscle  
594 differentiation and degradation. *Biochem Biophys Res Commun* **516**, 951-956,  
595 doi:10.1016/j.bbrc.2019.06.143 (2019).
- 596 22 Webster, J. M., Kempen, L., Hardy, R. S. & Langen, R. C. J. Inflammation and Skeletal  
597 Muscle Wasting During Cachexia. *Front Physiol* **11**, 597675,  
598 doi:10.3389/fphys.2020.597675 (2020).



- 599 23 Jatoi, A. *et al.* A placebo-controlled double blind trial of etanercept for the cancer  
600 anorexia/weight loss syndrome: results from N00C1 from the North Central Cancer  
601 Treatment Group. *Cancer* **110**, 1396-1403, doi:10.1002/cncr.22944 (2007).
- 602 24 Jatoi, A. *et al.* A placebo-controlled, double-blind trial of infliximab for cancer-associated  
603 weight loss in elderly and/or poor performance non-small cell lung cancer patients  
604 (N01C9). *Lung cancer* **68**, 234-239, doi:10.1016/j.lungcan.2009.06.020 (2010).
- 605 25 Bayliss, T. J., Smith, J. T., Schuster, M., Dragnev, K. H. & Rigas, J. R. A humanized anti-  
606 IL-6 antibody (ALD518) in non-small cell lung cancer. *Expert opinion on biological  
607 therapy* **11**, 1663-1668, doi:10.1517/14712598.2011.627850 (2011).
- 608 26 Marceca, G. P., Londhe, P. & Calore, F. Management of Cancer Cachexia: Attempting to  
609 Develop New Pharmacological Agents for New Effective Therapeutic Options. *Front  
610 Oncol* **10**, 298, doi:10.3389/fonc.2020.00298 (2020).
- 611 27 Honors, M. A. & Kinzig, K. P. The role of insulin resistance in the development of  
612 muscle wasting during cancer cachexia. *J Cachexia Sarcopenia Muscle* **3**, 5-11,  
613 doi:10.1007/s13539-011-0051-5 (2012).
- 614 28 Barbera, M. C. *et al.* Increased expression of Ectodysplasin A2 Receptor EDA2R is the  
615 most remarkable and ubiquitous aging-related transcriptional hallmark. *Preprint*,  
616 doi:10.21203/rs.3.rs-774469/v1 (2021).
- 617 29 Brightbill, H. D. *et al.* Conditional Deletion of NF-kappaB-Inducing Kinase (NIK) in  
618 Adult Mice Disrupts Mature B Cell Survival and Activation. *Journal of immunology* **195**,  
619 953-964, doi:10.4049/jimmunol.1401514 (2015).
- 620 30 Springer, M. L., Rando, T. A. & Blau, H. M. Gene delivery to muscle. *Curr Protoc Hum  
621 Genet* **Chapter 13**, Unit13 14, doi:10.1002/0471142905.hg1304s31 (2002).
- 622 31 Loumaye, A. *et al.* Role of Activin A and myostatin in human cancer cachexia. *J Clin  
623 Endocrinol Metab* **100**, 2030-2038, doi:10.1210/jc.2014-4318 (2015).
- 624 32 Fearon, K. *et al.* Definition and classification of cancer cachexia: an international  
625 consensus. *Lancet Oncol* **12**, 489-495, doi:10.1016/S1470-2045(10)70218-7 (2011).
- 626 33 Gueugneau, M. *et al.* Increased Serpina3n release into circulation during glucocorticoid-  
627 mediated muscle atrophy. *J Cachexia Sarcopenia Muscle* **9**, 929-946,  
628 doi:10.1002/jcsm.12315 (2018).
- 629 34 Judge, S. M. *et al.* Skeletal Muscle Fibrosis in Pancreatic Cancer Patients with Respect to  
630 Survival. *JNCI Cancer Spectr* **2**, pky043, doi:10.1093/jncics/pky043 (2018).
- 631 35 Gallagher, I. J. *et al.* Suppression of skeletal muscle turnover in cancer cachexia: evidence  
632 from the transcriptome in sequential human muscle biopsies. *Clin Cancer Res* **18**, 2817-  
633 2827, doi:10.1158/1078-0432.CCR-11-2133 (2012).
- 634 36 Haslett, J. N. *et al.* Gene expression profiling of Duchenne muscular dystrophy skeletal  
635 muscle. *Neurogenetics* **4**, 163-171, doi:10.1007/s10048-003-0148-x (2003).
- 636 37 Wang, L. H. *et al.* MRI-informed muscle biopsies correlate MRI with pathology and  
637 DUX4 target gene expression in FSHD. *Hum Mol Genet* **28**, 476-486,  
638 doi:10.1093/hmg/ddy364 (2019).
- 639 38 Wong, C. J. *et al.* Longitudinal measures of RNA expression and disease activity in  
640 FSHD muscle biopsies. *Hum Mol Genet* **29**, 1030-1043, doi:10.1093/hmg/ddaa031  
641 (2020).

642

643

644 **Acknowledgements**

645 The authors gratefully acknowledge the use of the animal facility infrastructure at Koc University  
646 Research Center for Translational Medicine (KUTTAM). The authors thank Prof. Michael Kracht  
647 (JLU Giessen) for sharing human NIK plasmids and Prof. Shao-Cong Sun (MD Anderson Cancer  
648 Center) for sharing NIK-floxed mice. EDA2R-null and NIK-floxed mice were provided by  
649 Genentech. The authors also appreciate the assistance received from Ibrahim Oguz. D.H.A. was  
650 funded by a TUBITAK-BIDEB scholarship. This work was supported by the Scientific and  
651 Technological Research Council of Turkey (TUBITAK) grants 118Z167, 118Z791 and 118C014,  
652 and the EMBO Installation Grant 4162 to S.K.

653 **Author contributions**

654 S.K. conceived and designed the experiments. S.N.B., A.D., B.T., S.A., B.Z.C.W., D.H.A., Z.O.,  
655 P.L., J.P.T., A.L. and S.K. performed the experiments. S.N.B., A.D., B.T., S.A. and S.K. analyzed  
656 the data. S.N.B., A.D. and S.K. wrote the manuscript.

657 **Competing interests**

658 The authors declare no competing financial interests.

659 **Data Availability**

660 Human gene expression datasets analyzed in this study are available in the GEO database;  
661 GSE130563<sup>34</sup>, GSE341111<sup>35</sup>, GSE1007<sup>36</sup>, GSE115650<sup>37</sup>, and GSE140261<sup>38</sup>. A detailed description  
662 of the cancer patient muscle biopsies used in this study was previously published<sup>31</sup>.

663 **Materials & Correspondence**

664 Correspondence and requests for materials should be addressed to S.K. ([skir@ku.edu.tr](mailto:skir@ku.edu.tr)).

665

666

**Figure 1**

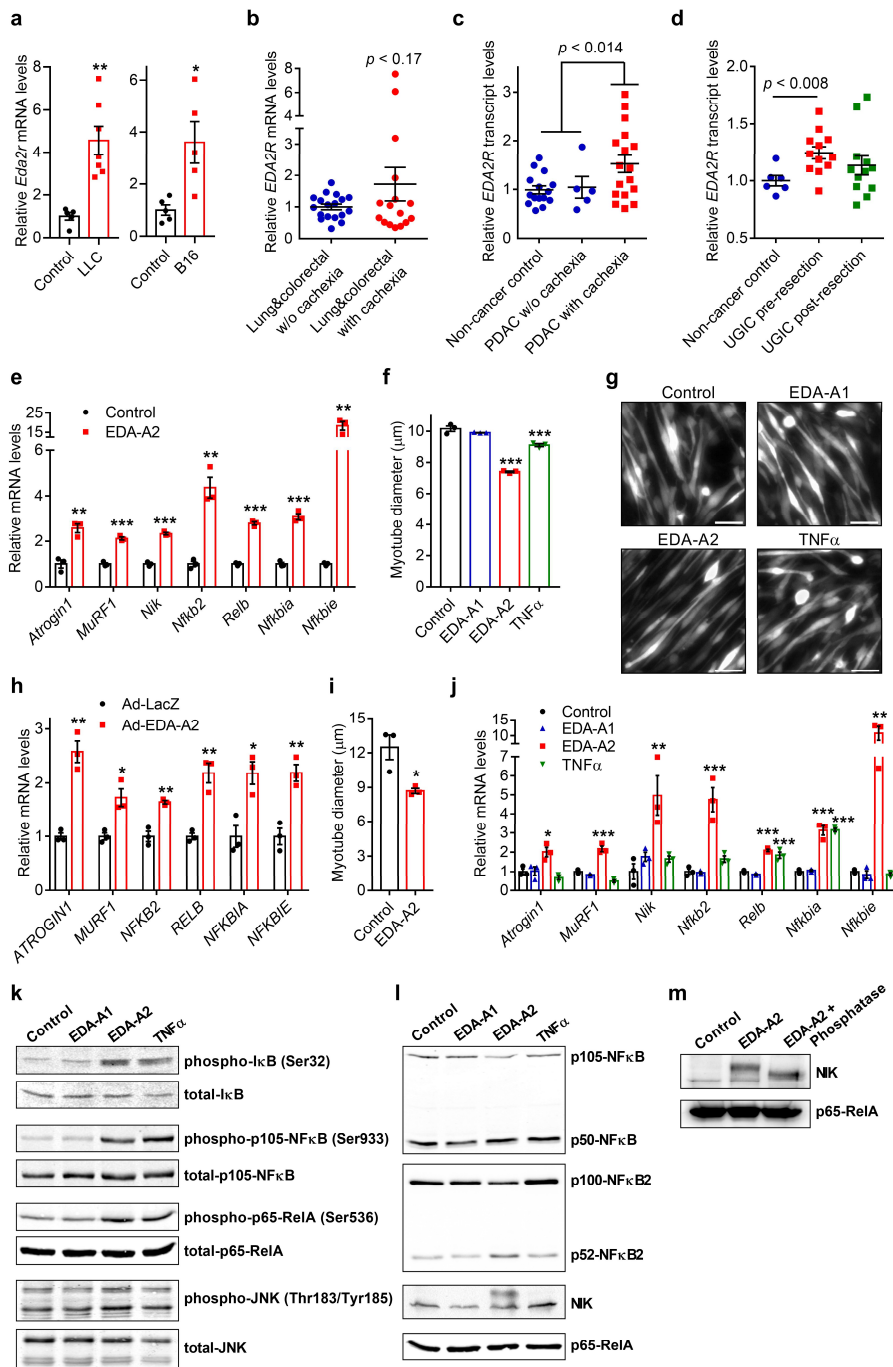

667

668 **Figure 1. EDA-A2 promotes atrophy and activates NF $\kappa$ B signaling in myotubes.** **a**, *Eda2r* mRNA levels were  
 669 tested by RT-qPCR in gastrocnemius muscles of mice bearing LLC tumors (for 16 days) (control n = 5, LLC n = 7) or  
 670 B16 tumors (for 14 days) (n = 5). **b**, *EDA2R* mRNA levels were determined by RT-qPCR in quadriceps muscle biopsies  
 671 of lung and colorectal cancer patients with or without cachexia (w/o cachexia n = 16, with cachexia n = 18). **c**, *EDA2R*  
 672 transcript levels were analyzed in rectus abdominis muscle biopsies from non-cancer controls (n = 15), and PDAC  
 673 patients with cachexia (n = 17) and without cachexia (n = 5) (GSE130563). **d**, *EDA2R* transcript levels were analyzed  
 674 in quadriceps muscle biopsies collected from non-cancer subjects (n = 6) and cachectic patients with upper

675 gastrointestinal cancer (n = 12) before and after tumor resection (GSE34111). **e**, Fully differentiated mouse primary  
 676 myotubes were treated with recombinant EDA-A2 (250 ng/ml) for 24 hr and gene expression was determined by RT-  
 677 qPCR (n = 3). **f,g**, Mouse primary myotubes were treated with recombinant EDA-A1, EDA-A2 or TNF $\alpha$  proteins (250  
 678 ng/ml each) for 48 hr. Cells also transduced with a GFP adenovirus were visualized under the fluorescence microscope.  
 679 Average myotube diameter was measured (n = 3) (**f**). The scale bar is 50  $\mu$ m (**g**). **h,i**, Human Skeletal Muscle Myoblasts  
 680 (HSMM) were differentiated into myotubes and treated with an adenovirus expressing EDA-A2 (**h**) or recombinant  
 681 EDA-A2 protein (250 ng/ml) (**i**) for 48 hr. Gene expression was determined by RT-qPCR (n = 3) (**h**) and myotube  
 682 diameter was measured (n = 3) (**i**). **j-m**, Mouse primary myotubes were treated with EDA-A1, EDA-A2 or TNF $\alpha$  (250  
 683 ng/ml each) for 24 hr (**j,l,m**) or 10 min (**k**). Changes in gene expression were determined by RT-qPCR (n = 3) (**j**). Cell  
 684 lysates were investigated by western blotting (**k,l**). The lysate of EDA-A2-treated myotubes was also treated with  
 685 alkaline phosphatase (**m**). The values are mean  $\pm$  SEM. Statistical analysis was conducted using the two-tailed *t*-test  
 686 (**a,b,c,d,e,h,i**) and one-way ANOVA (**f,j**). \**p* < 0.05, \*\**p* < 0.01, \*\*\**p* < 0.001, compared with the Control group.

**Figure 2**

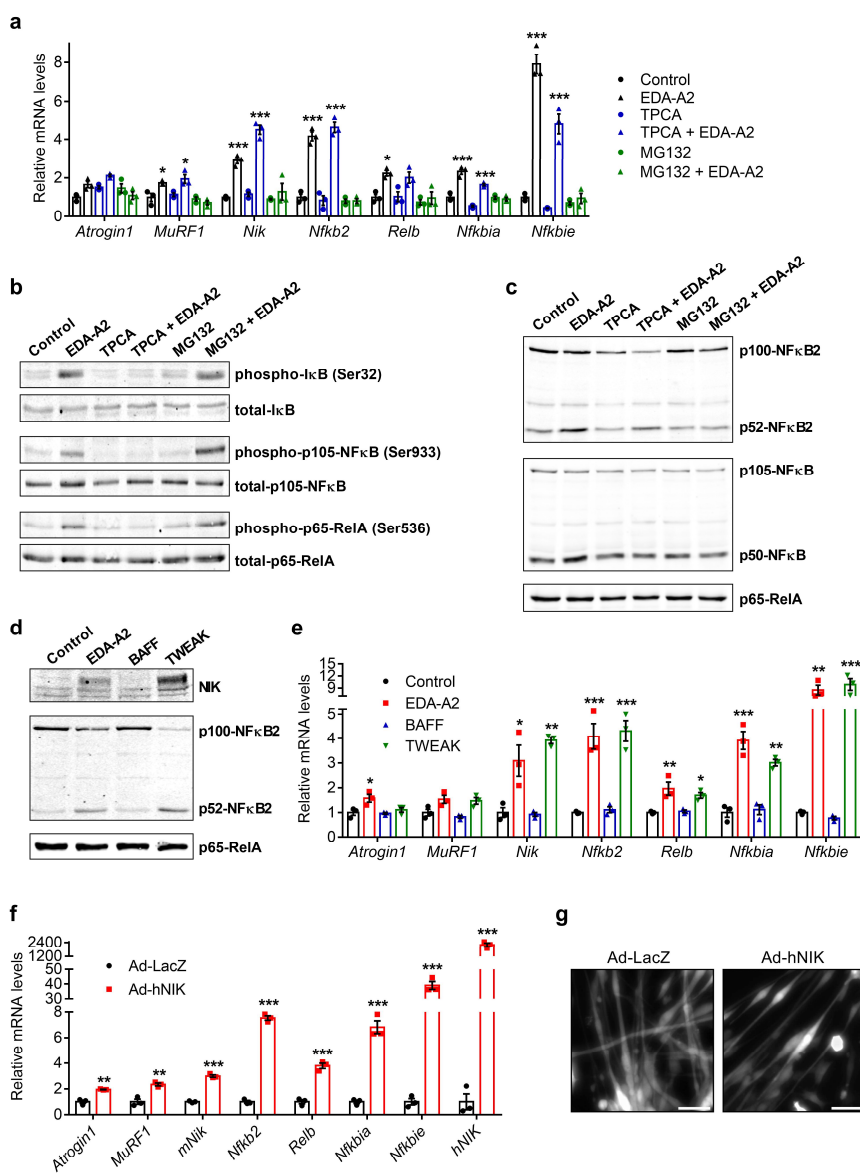

687

688 **Figure 2. Activation of the noncanonical NFκB signaling by EDA-A2 or NIK kinase induces atrophy in primary**  
 689 **myotubes.** **a**, Mouse primary myotubes were treated with IKKβ inhibitor TPCA-1 (10 μM), proteasome inhibitor  
 690 MG132 (5 μM) and EDA-A2 (250 ng/ml) for 24 hr. Changes in gene expression were determined by RT-qPCR (n =  
 691 3). **b,c**, Primary myotubes were treated with TPCA-1 (10 μM) or proteasome inhibitor MG132 (5 μM) and EDA-A2  
 692 (250 ng/ml) for 10 min (**b**) or 24 hr (**c**) and protein levels of NFκB signaling components were studied by western  
 693 blotting. **d,e**, Primary myotubes were treated with recombinant EDA-A2, BAFF or TWEAK proteins (250 ng/ml each)  
 694 for 24 hr. Protein levels were determined by western blotting (**d**) and gene expression was studied by RT-qPCR (n =  
 695 3) (**e**). **f,g**, Primary myotubes were transduced with adenoviruses expressing LacZ or human NIK (hNIK). 24hr later,  
 696 changes in gene expression were determined by RT-qPCR (n = 3) (**f**). Myotubes also treated with GFP adenovirus  
 697 were visualized 48 hr later under the fluorescence microscope. The scale bar is 50 μm (**g**). The values are mean ± SEM.  
 698 Statistical analysis was conducted using one-way ANOVA (**a,e**) and the two-tailed *t*-test (**f**). \**p* < 0.05, \*\**p* < 0.01,  
 699 \*\*\**p* < 0.001, compared with the control group or the respective inhibitor only group.

**Figure 3**

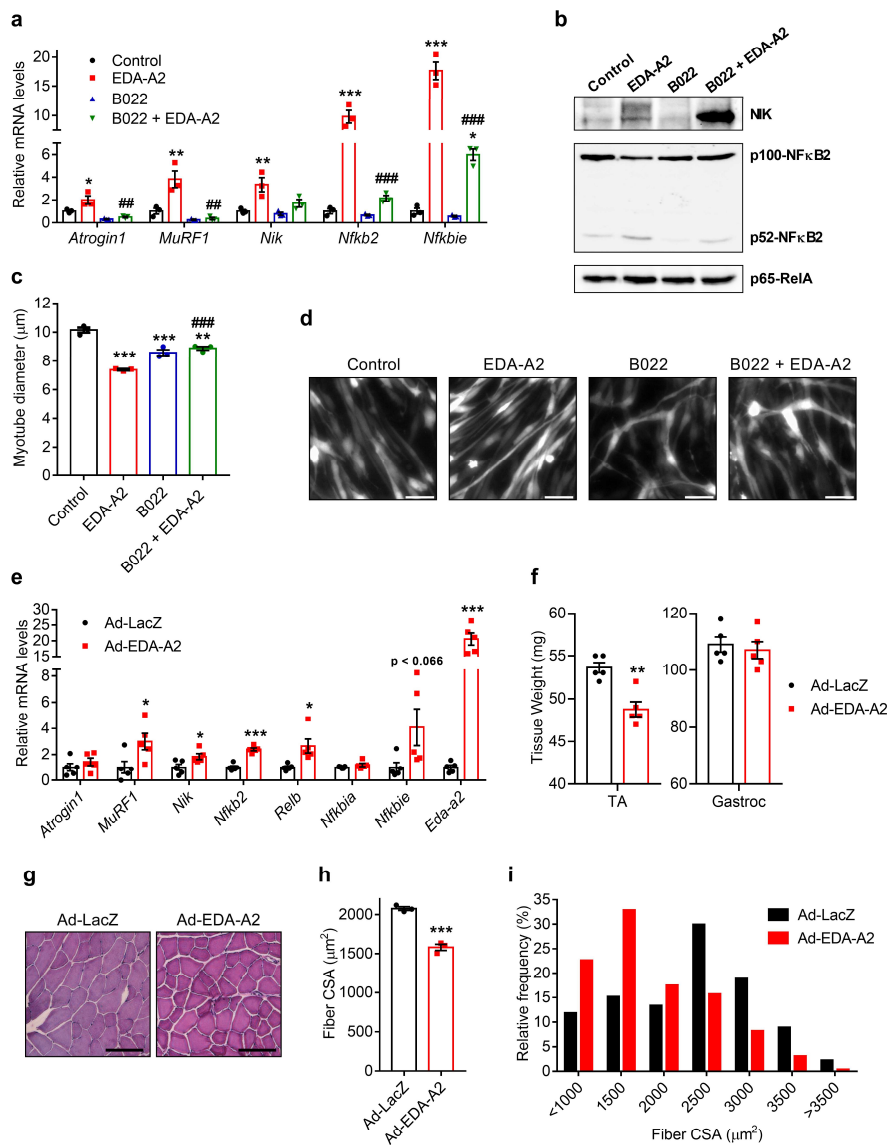

700



701 **Figure 3. EDA-A2-driven muscle atrophy requires NIK kinase activity.** **a,b,** Mouse primary myotubes were treated  
 702 with NIK kinase inhibitor B022 (5  $\mu$ M) and EDA-A2 (250 ng/ml) for 24 hr. Changes in gene expression were tested  
 703 by RT-qPCR (n = 3) (**a**) and protein levels were determined by western blotting (**b**). **c,d,** Primary myotubes transduced  
 704 with GFP adenovirus were treated with B022 (5  $\mu$ M) and EDA-A2 (250 ng/ml) for 48 hr. Cells were visualized under  
 705 the fluorescence microscope and myotube diameters were measured (n = 3). The scale bar is 50  $\mu$ m. **e-i,** Tibialis  
 706 anterior muscles of mice were transduced with LacZ or EDA-A2 adenoviruses. Mice were sacrificed 7 days later (n =  
 707 5). Changes in gene expression were determined by RT-qPCR (n = 5) (**e**). Tissues were weighed (**f**) and H&E stained  
 708 (**g**). Muscle fiber cross-sectional area (CSA) (**h**) and the fiber frequency distribution were determined (**i**) (n = 3). The  
 709 scale bar is 100  $\mu$ m. The values are mean  $\pm$  SEM. Statistical analysis was conducted using one-way ANOVA (**a,c**) and  
 710 the two-tailed *t*-test (**e,f,h**). \**p* < 0.05, \*\**p* < 0.01, \*\*\**p* < 0.001, compared with the control group or the Ad-LacZ  
 711 group. ##*p* < 0.01, ###*p* < 0.001 compares differences between EDA-A2 and B022 + EDA-A2 treatment groups.

**Figure 4**

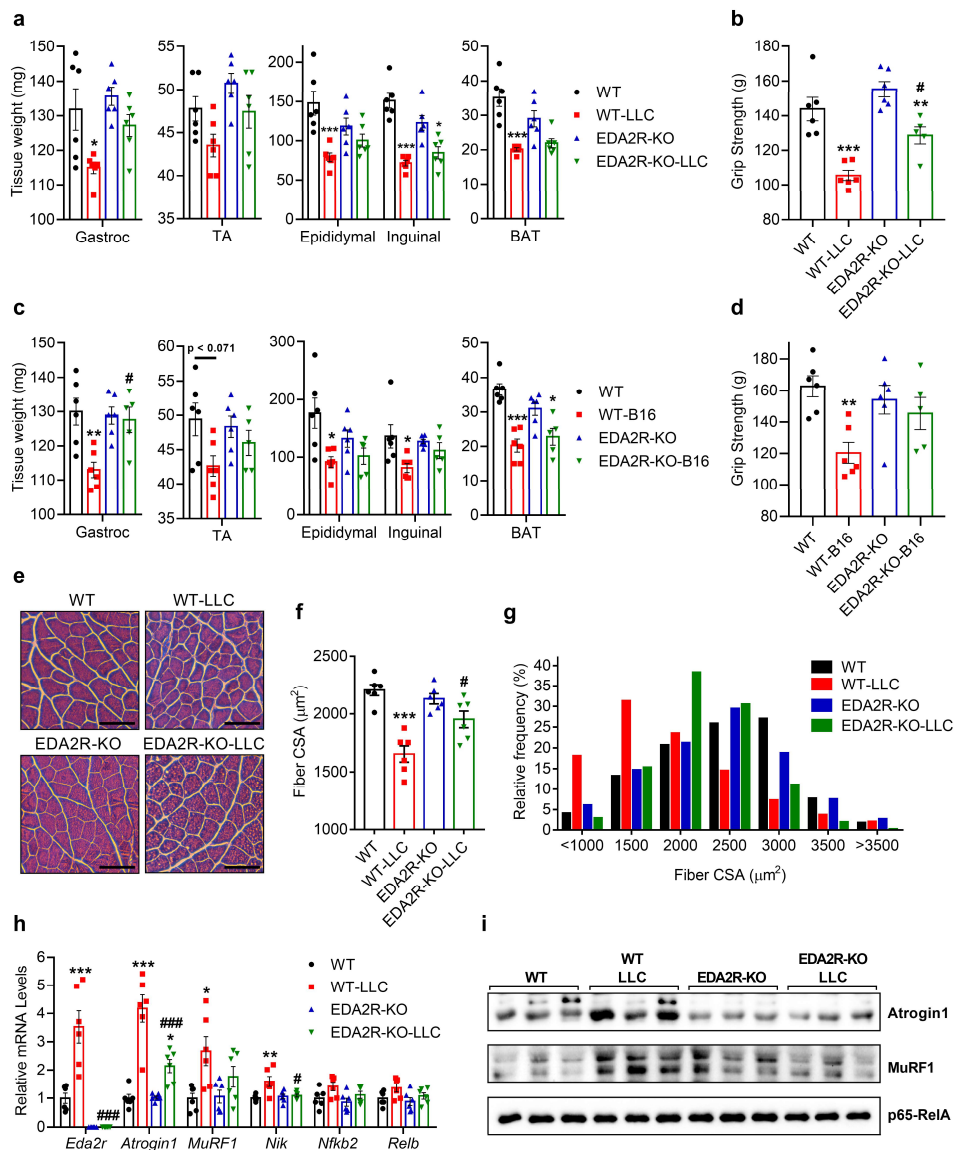

712 **Figure 4. EDA2R-deficient mice are resistant to tumor-driven muscle wasting.** **a,b, e-i,** Mice were inoculated with  
 713 LLC cells and sacrificed 16 days later. Collected tissues were weighed (n = 6) (**a**). Forelimb grip strength was measured  
 714

715 before the sacrifice (EDA2R-KO-LLC n = 5, other groups n = 6) (**b**). **c,d**, Mice were inoculated with B16 cells and  
716 sacrificed 14 days later (EDA2R-KO-B16 n = 5, other groups n = 6). Collected tissues were weighed (**c**). Forelimb  
717 grip strength was measured before the sacrifice (**d**). **e-g**, Gastrocnemius muscle cross-sections were H&E stained (**e**),  
718 cross-sectional area (**f**) and the fiber frequency distribution (**g**) were measured (n = 6). The scale bar is 100  $\mu$ m. **h,i**,  
719 Gastrocnemius muscle mRNA levels were tested by RT-qPCR (n = 6) (**h**) and their protein levels were determined by  
720 western blotting (n = 3) (**i**). The values are mean  $\pm$  SEM. Statistical analysis was conducted using two-way ANOVA.  
721 \* $p$  < 0.05, \*\* $p$  < 0.01, \*\*\* $p$  < 0.001 compares differences between tumor-bearing and non-tumor-bearing mice of the  
722 same genotype. # $p$  < 0.05, ### $p$  < 0.001 compares differences between tumor-bearing wild-type and tumor-bearing  
723 knockout mice.

**Figure 5**

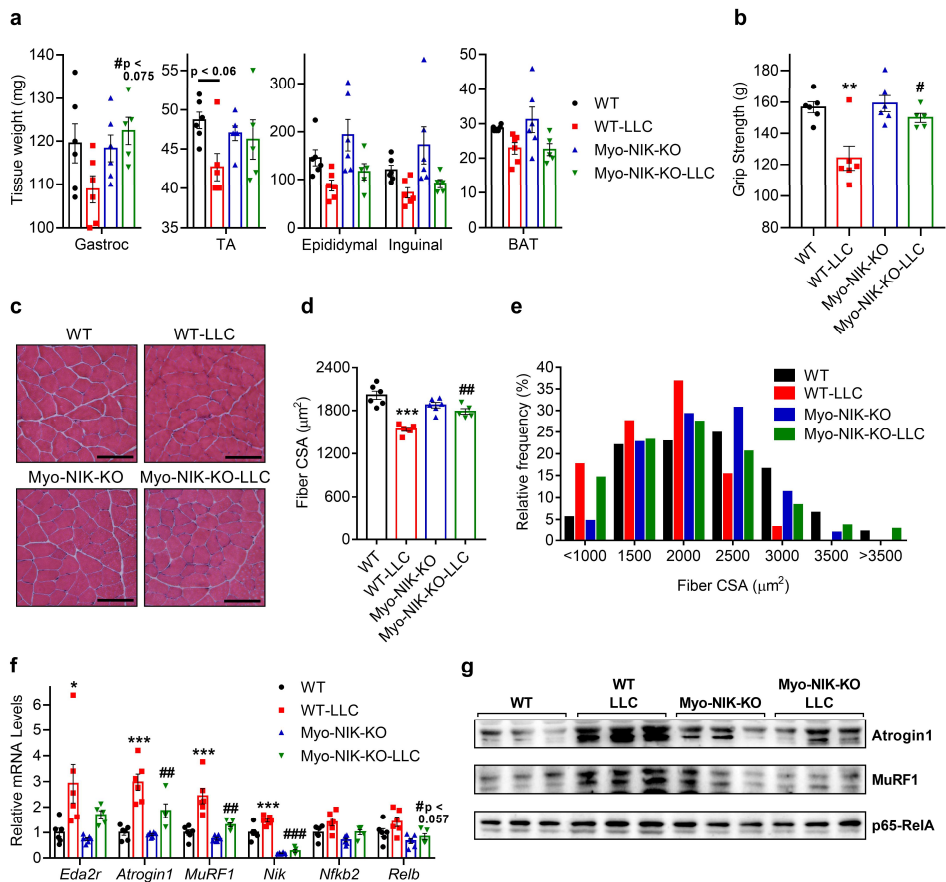

724 **Figure 5. Muscle-specific depletion of NIK protects from tumor-driven muscle wasting.** **a-g**, Mice were inoculated  
725 with LLC cells and sacrificed 16 days later (Myo-NIK-KO-LLC n = 5, other groups n = 6). Collected tissues were  
726 weighed (**a**). Forelimb grip strength was measured before the sacrifice (**b**). **c-e**, Gastrocnemius muscle cross-sections  
727 were H&E stained (**c**), cross-sectional area (**d**) and the fiber frequency distribution (**e**) were measured. The scale bar  
728 is 100  $\mu$ m. **f,g**, Gastrocnemius muscle mRNA levels were tested by RT-qPCR (Myo-NIK-KO-LLC n = 5, other groups  
729 n = 6) (**f**) and their protein levels were determined by western blotting (n = 3) (**g**). The values are mean  $\pm$  SEM.  
730 Statistical analysis was conducted using two-way ANOVA. \* $p$  < 0.05, \*\* $p$  < 0.01, \*\*\* $p$  < 0.001 compares differences  
731 between WT and WT-LLC groups. # $p$  < 0.05, ## $p$  < 0.01, ### $p$  < 0.001 compares differences between WT-LLC and  
732 Myo-NIK-KO-LLC groups.  
733

Figure 6

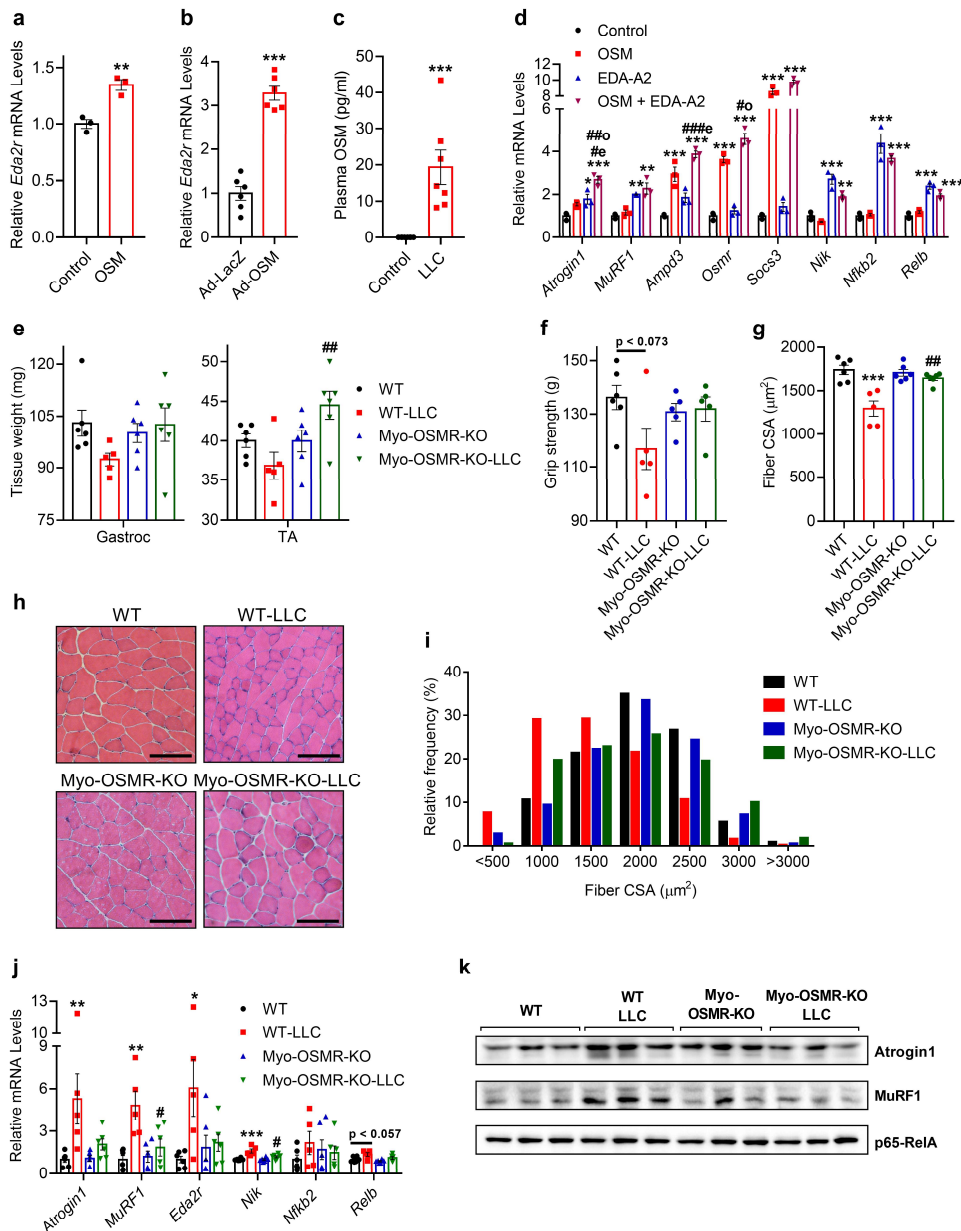

734

735 **Figure 6. OSM induces *Eda2r* expression in muscle and the depletion of OSMR protects from muscle wasting.**

736 **a**, Mouse primary myotubes were treated with recombinant OSM (250 ng/ml) for 6 hr (n = 3). **b**, Tibialis anterior  
 737 muscles of mice were transduced with LacZ or OSM adenoviruses. Mice were sacrificed 7 days later. mRNA levels  
 738 were determined by RT-qPCR (n = 6). **c**, Mice were inoculated with LLC cells and sacrificed 16 days later. Plasma  
 739 OSM levels were measured by ELISA (control n = 8, LLC n = 7) **d**, Mouse primary myotubes were treated with  
 740 recombinant OSM (250 ng/ml for 48hr) and EDA-A2 (100 ng/ml for 24 hr). Changes in gene expression were  
 741 determined by RT-qPCR (n = 3). **e-k**, Mice were inoculated with LLC cells and sacrificed 16 days later (WT-LLC n  
 742 = 5, other groups n = 6). Collected tissues were weighed (**e**). Forelimb grip strength was measured before the sacrifice  
 743 (WT n = 6, other groups n = 5) (**f**). Gastrocnemius muscle cross-sections were H&E stained (**h**), cross-sectional area  
 744 (**g**) and the fiber frequency distribution (**i**) were measured (WT-LLC n = 5, other groups n = 6). The scale bar is 100

745  $\mu\text{m}$ . **j,k**, Gastrocnemius muscle mRNA levels were tested by RT-qPCR (WT-LLC  $n = 5$ , other groups  $n = 6$ ) (**j**) and  
 746 their protein levels were determined by western blotting ( $n = 3$ ) (**k**). The values are mean  $\pm$  SEM. Statistical analysis  
 747 was conducted using the two-tailed  $t$ -test (**a,b,c**), one-way ANOVA (**d**), and two-way ANOVA (**e,f,g,j**).  $*p < 0.05$ ,  
 748  $**p < 0.01$ ,  $***p < 0.001$ , compared to the Control or Ad-LacZ groups (**a,b,c,d**).  $\#op < 0.05$ ,  $\#\#op < 0.01$ , compared  
 749 to the OSM group, and  $\#ep < 0.05$ ,  $\#\#\#ep < 0.001$  compared to the EDA-A2 group (**d**).  $*p < 0.05$ ,  $**p < 0.01$ ,  $***p <$   
 750  $0.001$  compares differences between WT and WT-LLC groups and  $\#p < 0.05$ ,  $\#\#p < 0.01$  compares differences between  
 751 WT-LLC and Myo-OSMR-KO-LLC groups (**e,g,j**).

### Extended Data Figure 1

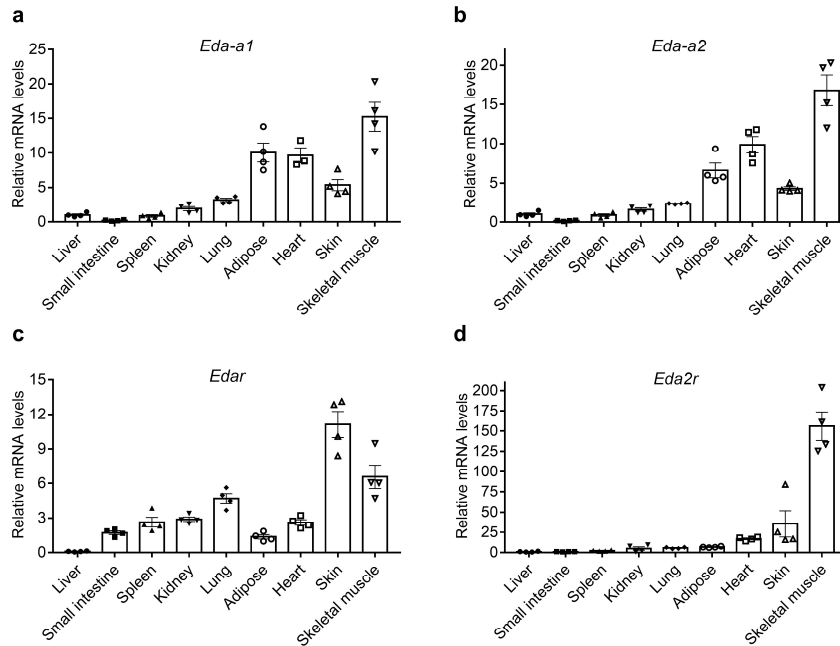

752  
 753 **Extended Data Figure 1. The expression of *Eda-a2* and *Eda2r* is enriched in skeletal muscle tissue.** **a-d**, Various  
 754 tissue samples were collected from C57BL/6 mice. Relative mRNA levels were determined by RT-qPCR ( $n = 4$ ). The  
 755 values are mean  $\pm$  SEM.

### Extended Data Figure 2

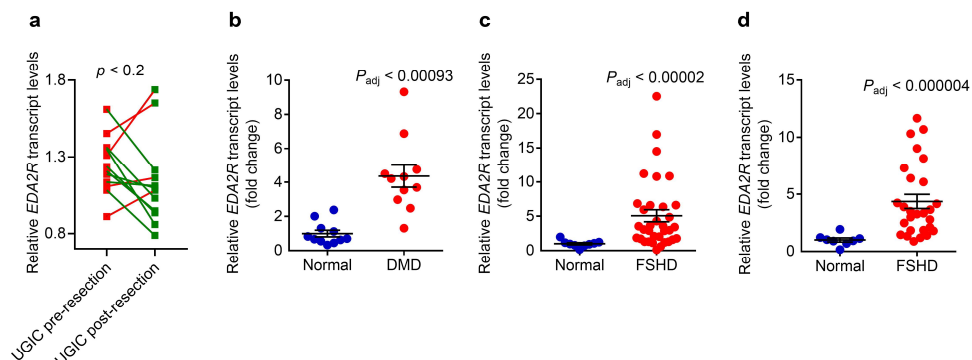

756  
 757 **Extended Data Figure 2. *EDA2R* expression is induced in DMD and FSHD patients.** **a**, *EDA2R* transcript levels  
 758 were analyzed in quadriceps muscle biopsies collected from cachectic patients with upper gastrointestinal cancer ( $n =$   
 759 12) before and after tumor resection (GSE34111). Upon surgery, *EDA2R* levels were upregulated in 4 patients (red

760 connecting lines) and downregulated in 8 patients (green connecting lines). Statistics by two-tailed paired *t*-test. **b**,  
 761 GSE1007 dataset was analyzed by GEO2R and *EDA2R* expression values were determined in normal subjects and  
 762 DMD patients (n = 10). In each group, one individual had 2 technical replicates making the total number of data points  
 763 11. **c**, GSE115650 dataset was analyzed by DESeq2 and *EDA2R* expression values were determined in normal subjects  
 764 (n = 9) and FSHD patients (n = 34). **d**, GSE140261 dataset was analyzed by DESeq2 and *EDA2R* expression values  
 765 were determined in normal subjects (n = 8) and FSHD patients (n = 27). The values are mean ± SEM. Statistical values  
 766 were adjusted for multiple tests.

### Extended Data Figure 3

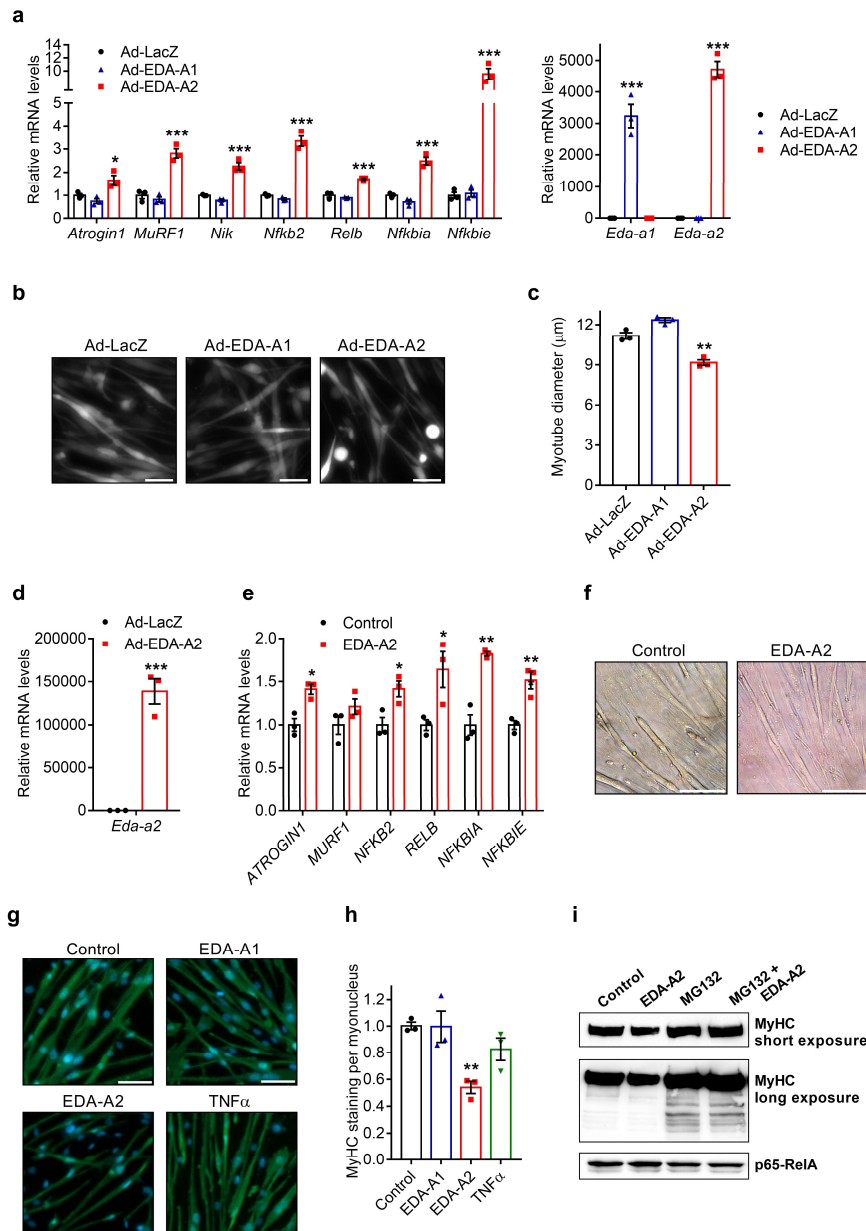

767 **Extended Data Figure 3. The overexpression of EDA-A2 or the administration of recombinant EDA-A2 in human and mouse myotubes stimulates cellular atrophy.** **a-c**, Mouse primary myotubes were transduced with LacZ,  
 768 EDA-A1, or EDA-A2 expressing adenoviruses. 24 hr later, gene expression was tested by RT-qPCR (n = 3) (**a**).  
 769  
 770



771 Myotubes also treated with GFP adenovirus were visualized 48 hr later under the fluorescence microscope. The scale  
 772 bar is 50  $\mu\text{m}$  (b). Average myotube diameter was measured ( $n = 3$ ) (c). d-f, Human Skeletal Muscle Myoblasts  
 773 (HSMM) were differentiated into myotubes and treated with an adenovirus expressing EDA-A2 (d) or recombinant  
 774 EDA-A2 protein (250 ng/ml) (e,f) for 48 hr. Gene expression was determined by RT-qPCR ( $n = 3$ ) (d,e). Human  
 775 myotubes were investigated under the light microscope. The scale bar is 100  $\mu\text{m}$  (f). g,h, Mouse primary myotubes  
 776 were treated with recombinant EDA-A1, EDA-A2 or TNF $\alpha$  proteins (250 ng/ml each) for 48 hr. MyHC was  
 777 immunofluorescently labeled while nuclei was counterstained with DAPI. The scale bar is 50  $\mu\text{m}$  (g). MyHC signal  
 778 was normalized to the number of myotube nuclei ( $n = 3$ ) (h). i, Mouse primary myotubes treated with recombinant  
 779 EDA-A2 (250 ng/ml) and proteasome inhibitor MG132 (10  $\mu\text{M}$ ) were lysed and protein samples were studied by  
 780 western blotting. The values are mean  $\pm$  SEM. Statistical analysis was conducted using one-way ANOVA (a,c,h) or  
 781 the two-tailed  $t$ -test (d,e). \* $p < 0.05$ , \*\* $p < 0.01$ , \*\*\* $p < 0.001$ , compared with the Ad-LacZ or the Control group.

Extended Data Figure 4

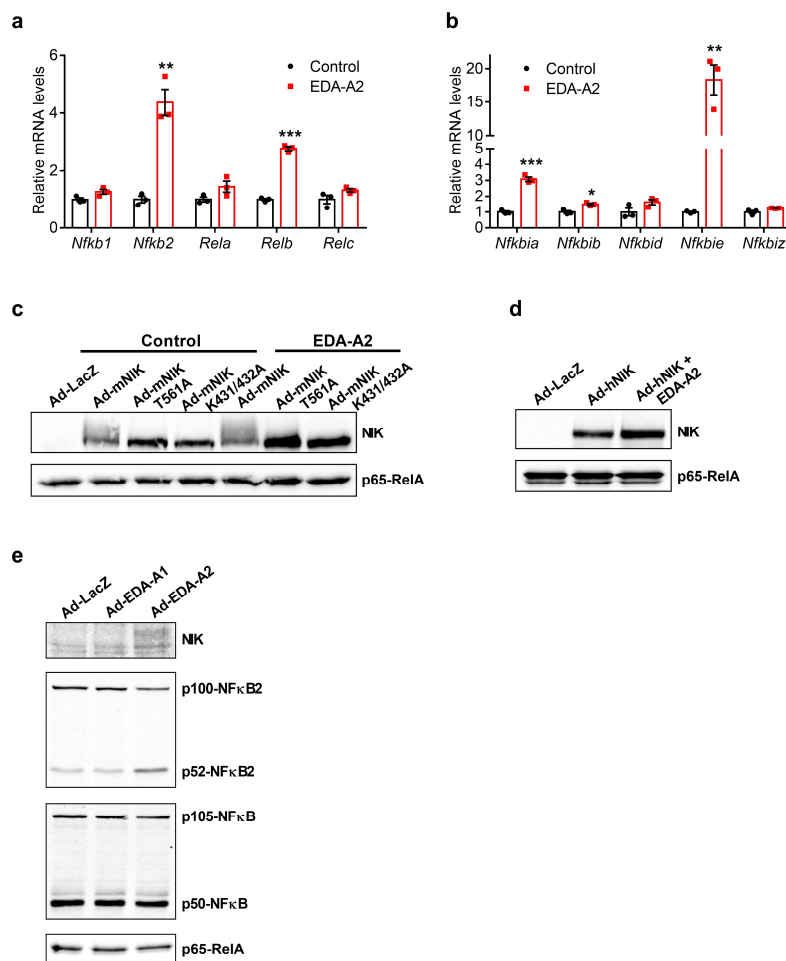

782

783 **Extended Data Figure 4. EDA-A2 stimulates the expression of NF $\kappa$ B signaling components and the alternative**  
 784 **NF $\kappa$ B activation in primary myotubes. Electrophoretic mobility shift of mouse NIK protein depends on its**  
 785 **autophosphorylation and kinase activity.** a,b, Mouse primary myotubes were treated with recombinant EDA-A2  
 786 (250 ng/ml) for 24 hr and gene expression was determined by RT-qPCR ( $n = 3$ ). c,d, Mouse primary myotubes were  
 787 transduced with adenoviruses expressing LacZ, wild-type mouse NIK (mNIK), autophosphorylation-deficient mNIK-  
 788 T561A mutant and kinase-dead mNIK-K431/432A mutant or human NIK (hNIK). A day later, recombinant EDA-A2  
 789 (250 ng/ml) was also added for another 24 hr. Protein levels were determined by western blotting. e, Mouse primary

790 myotubes were transduced with LacZ, EDA-A1, or EDA-A2 expressing adenoviruses. 24 hr later, protein levels were  
791 determined by western blotting. The values are mean  $\pm$  SEM. Statistical analysis was conducted using the two-tailed  
792 *t*-test. \**p* < 0.05, \*\**p* < 0.01, \*\*\**p* < 0.001, compared with the Control group.

### Extended Data Figure 5

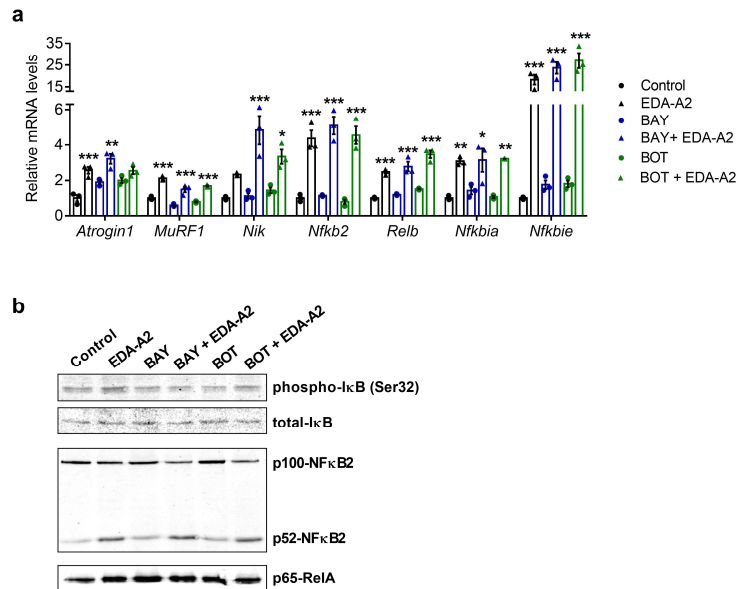

793

794 **Extended Data Figure 5. Activation of the canonical NFκB signaling is dispensable for EDA-A2-induced gene**  
795 **expression in primary myotubes. a,b,** Mouse primary myotubes were treated with IκB phosphorylation inhibitors  
796 BAY 11-7082 (10 μM) and BOT-64 (10 μM) in combination with recombinant EDA-A2 (250 ng/ml) for 24 hr. Gene  
797 expression was studied by RT-qPCR (n = 3) (a) and protein levels were determined by western blotting (b). The values  
798 are mean  $\pm$  SEM. Statistical analysis was conducted using one-way ANOVA. \**p* < 0.05, \*\**p* < 0.01, \*\*\**p* < 0.001,  
799 compared with the control group or the respective inhibitor only group.

### Extended Data Figure 6

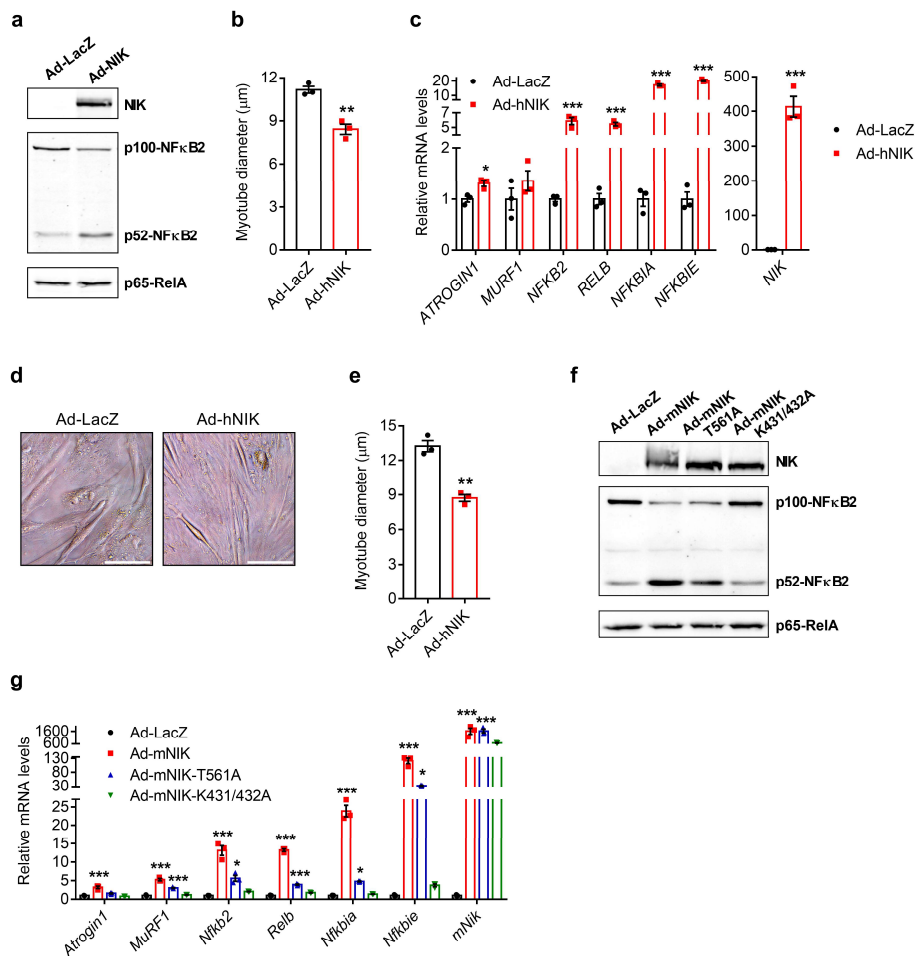

800  
 801 **Extended Data Figure 6. Overexpression of NIK promotes the alternative NFκB activation and atrophy in**  
 802 **primary myotubes. a,b,** Mouse primary myotubes were transduced with adenoviruses expressing LacZ or human  
 803 NIK (hNIK). 24hr later, protein levels were determined by western blotting (a). Myotubes also treated with GFP  
 804 adenovirus were visualized 48 hr later under the fluorescence microscope and average myotube diameter was measured  
 805 (n = 3) (b). **c-e,** Human Skeletal Muscle Myoblasts (HSMM) were differentiated into myotubes and treated with  
 806 adenoviruses expressing LacZ or human hNIK for 48 hr. Gene expression was determined by RT-qPCR (n = 3) (c).  
 807 Human myotubes were investigated under the light microscope. The scale bar is 100 μm (d). Myotube diameter was  
 808 measured (n = 3) (e). **f,g,** Primary myotubes were transduced with adenoviruses expressing LacZ, mouse NIK (mNIK),  
 809 autophosphorylation-deficient mNIK-T561A mutant or kinase dead mNIK-K431/432A mutant. Protein levels were  
 810 determined by western blotting (f). This is the same experiment as Extended Data Fig. 4a. NIK and p65-RelA blots  
 811 were cropped from Extended Data Fig. 4a. mRNA levels were tested by RT-qPCR (g). The values are mean ± SEM.  
 812 Statistical analysis was conducted using the two-tailed *t*-test (b,c,e) and one-way ANOVA (g). \**p* < 0.05, \*\**p* < 0.01,  
 813 \*\*\**p* < 0.001, compared with the Ad-LacZ group.

Extended Data Figure 7

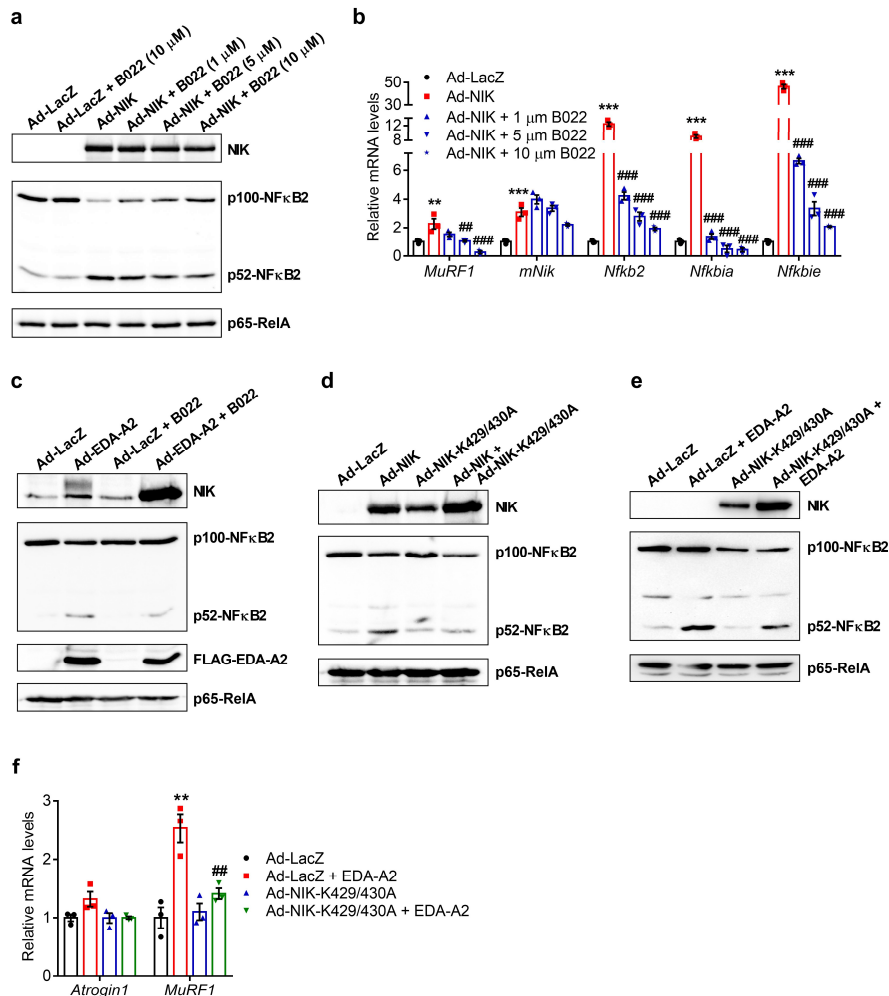

814  
 815 **Extended Data Figure 7. The inhibition of NIK kinase activity with B022 or a dominant-negative NIK mutant**  
 816 **blocks EDA-A2's effects in primary myotubes.** **a,b**, Mouse primary myotubes were transduced with adenoviruses  
 817 expressing LacZ or human NIK and treated with different doses of B022 (1 μM, 5 μM or 10 μM) for 24hr. Protein  
 818 levels were determined by western blotting (**a**) and changes in gene expression were tested by RT-qPCR (n = 3) (**b**).  
 819 **c**, Mouse primary myotubes were transduced with LacZ or EDA-A2 adenoviruses and treated with B022 (5 μM) for  
 820 24hr. Protein levels were determined by western blotting. **d**, Mouse primary myotubes were transduced with  
 821 adenoviruses expressing wild-type human NIK or the dominant-negative human NIK-K429/430A mutant. Protein  
 822 levels were determined by western blotting. **e,f**, Mouse primary myotubes were transduced with adenoviruses  
 823 expressing LacZ or the NIK-K429/430A mutant and treated with recombinant EDA-A2 (100 ng/ml) for 24hr. Protein  
 824 levels were determined by western blotting (**e**) and changes in gene expression were tested by RT-qPCR (n = 3) (**f**).  
 825 The values are mean ± SEM. Statistical analysis was conducted using one-way ANOVA. \*\**p* < 0.01, \*\*\**p* < 0.001,  
 826 compared with the Ad-LacZ group. ###*p* < 0.01, ####*p* < 0.001, compared with the Ad-NIK only group (**b**). ###*p* < 0.01  
 827 compares differences between EDA-A2 treatment groups (**f**).

**Extended Data Figure 8**

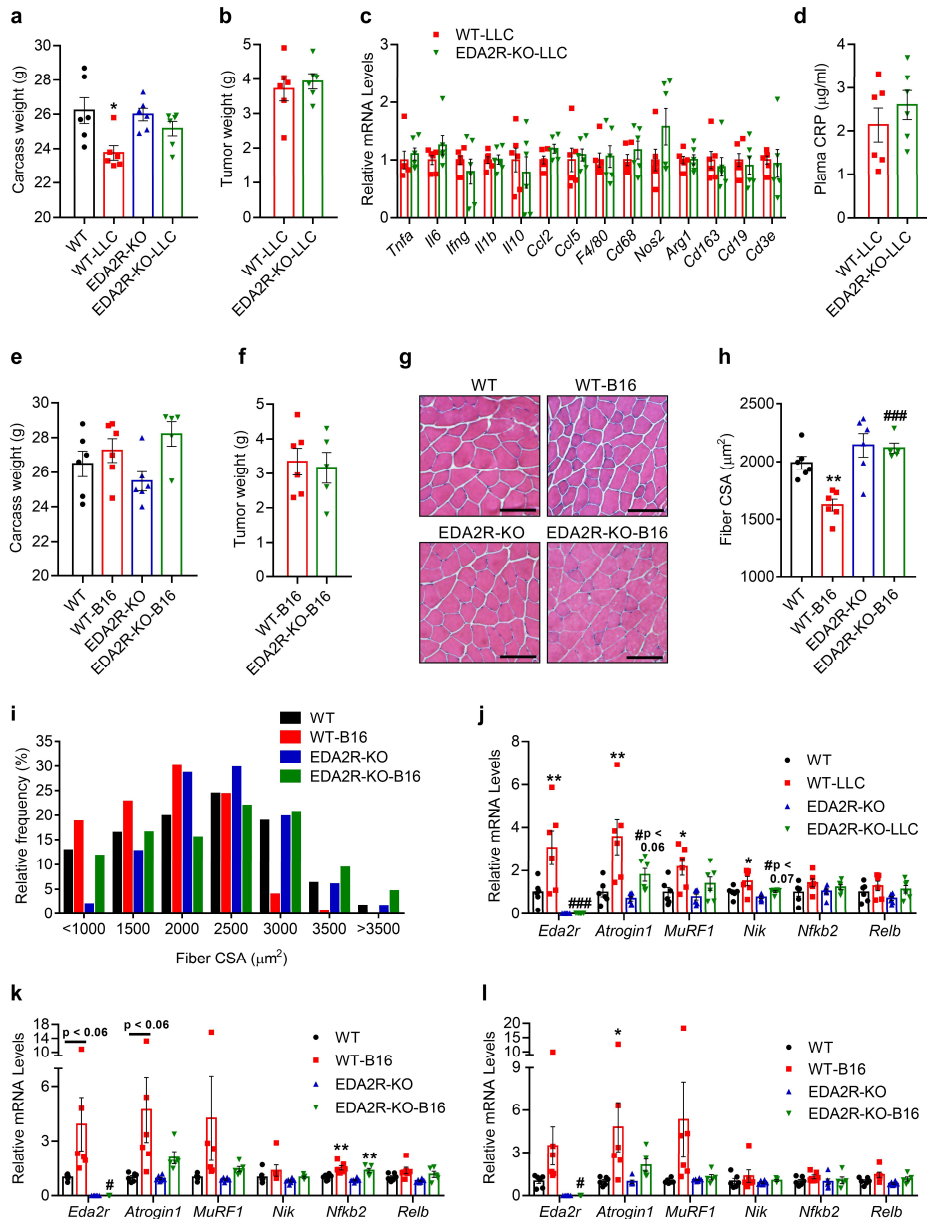

828  
 829 **Extended Data Figure 8. EDA2R-deficient mice are resistant to tumor-driven muscle wasting. a-d,j.** Mice were  
 830 inoculated with LLC cells and sacrificed 16 days later (n = 6). Carcass weight without the tumor mass (a) and tumor  
 831 weight (b) were measured. c, Gene expression levels in tumor samples were measured by RT-qPCR (n = 6). d, Plasma  
 832 CRP levels were determined by ELISA (n = 6). e-i, k-l, Mice were inoculated with B16 cells and sacrificed 14 days  
 833 later (EDA2R-KO-B16 n = 5, other groups n = 6). Carcass weight without the tumor mass (e) and tumor weight (f)  
 834 were measured. A decrease in carcass weight was induced by LLC tumors. However, tissue wasting was not reflected  
 835 in the carcass weight when mice received B16 tumors. Because these tumors cause excessive subcutaneous swelling  
 836 due to inflammation which masks the wasting. g-i, Gastrocnemius muscle cross-sections were H&E stained (g), cross-  
 837 sectional area (h) and the fiber frequency distribution (i) were measured. The scale bar is 100  $\mu\text{m}$ . j, Quadriceps muscle  
 838 mRNA levels of the LLC tumor-bearing mice were tested by RT-qPCR (n = 6). k,l, Gastrocnemius muscle (k) and  
 839 quadriceps muscle (l) mRNA levels of the B16 tumor-bearing mice were determined by RT-qPCR (EDA2R-KO-B16



840 n = 5, other groups n = 6). The values are mean  $\pm$  SEM. Statistical analysis was conducted using two-way ANOVA.  
841 \* $p < 0.05$ , \*\* $p < 0.01$  compares differences between tumor-bearing and non-tumor-bearing mice of the same genotype.  
842 # $p < 0.05$ , ### $p < 0.001$  compares differences between tumor-bearing wild-type and tumor-bearing knockout mice.

### Extended Data Figure 9

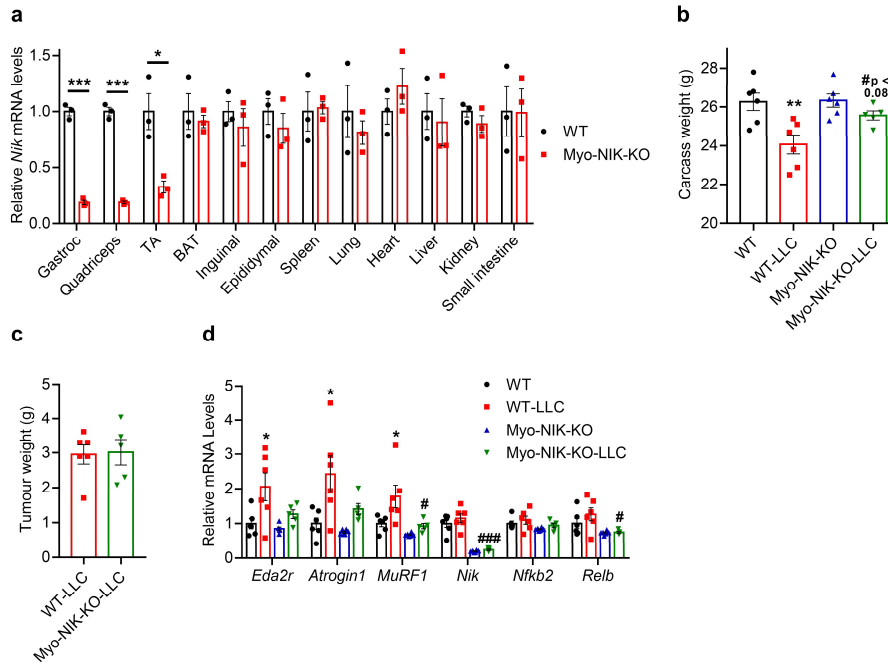

843 **Extended Data Figure 9. Muscle-specific depletion of NIK protects from tumor-driven muscle wasting.** **a.** *Nik*  
844 mRNA levels were tested by RT-qPCR in various tissues of the Myo-NIK-KO mice (n = 3). **b-d.** Mice were inoculated  
845 with LLC cells and sacrificed 16 days later (Myo-NIK-KO-LLC n = 5, other groups n = 6). Carcass weight without  
846 the tumor mass (**b**) and tumor weight (**c**) were measured. Quadriceps muscle mRNA levels were tested by RT-qPCR  
847 (Myo-NIK-KO-LLC n = 5, other groups n = 6) (**d**). Statistical analysis was conducted using the two-tailed *t*-test (**a**) or  
848 two-way ANOVA (**b,d**). \* $p < 0.05$ , \*\* $p < 0.01$ , \*\*\* $p < 0.001$  compares differences between WT and WT-LLC groups.  
849 # $p < 0.05$ , ### $p < 0.001$  compares differences between WT-LLC and Myo-NIK-KO-LLC groups.  
850

Extended Data Figure 10

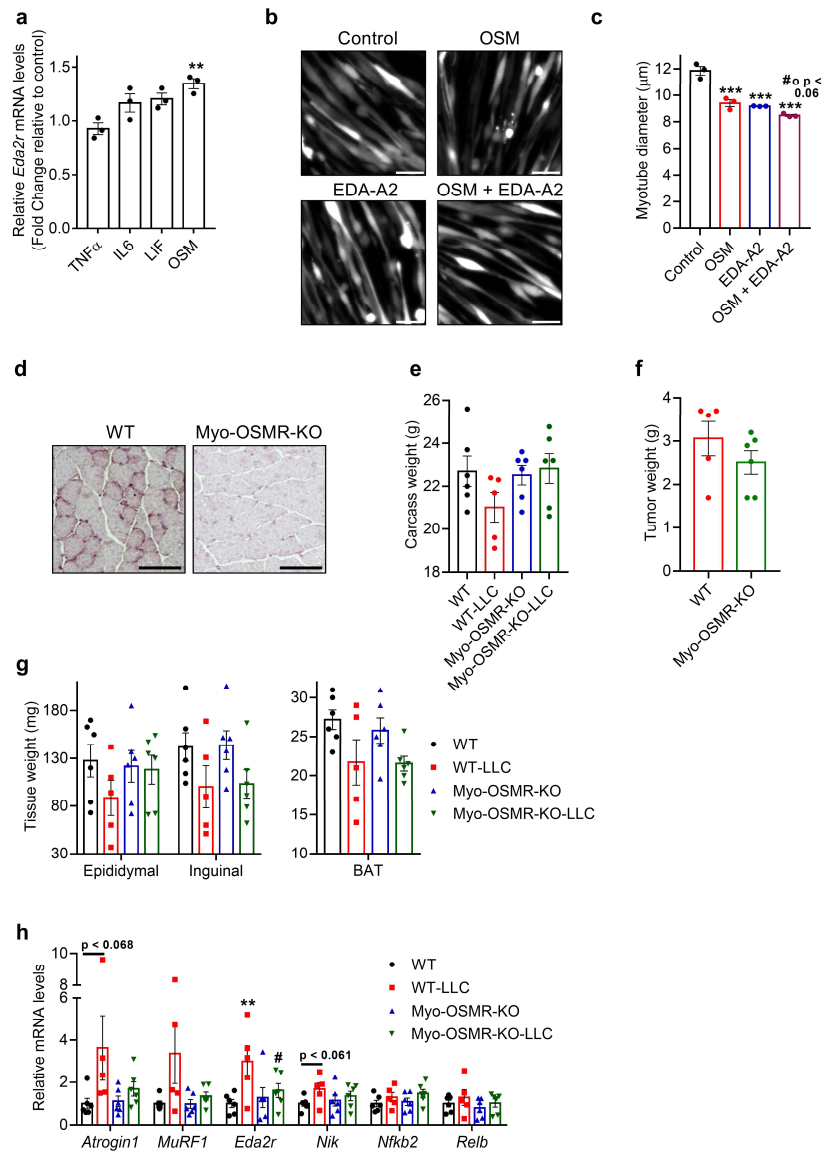

851

852 **Extended Data Figure 10. OSM induces *Eda2r* expression in muscle and the depletion of OSMR protects from**  
 853 **muscle wasting.** **a**, Mouse primary myotubes were treated with recombinant TNF $\alpha$ , IL-6, LIF and OSM (250 ng/ml  
 854 each). mRNA levels were determined by RT-qPCR (n = 3). **b-c**, Mouse primary myotubes were treated with  
 855 recombinant OSM and EDA-A2 (250 ng/ml each) for 48 hr. Myotubes also treated with the GFP adenovirus were  
 856 visualized under the fluorescence microscope. The scale bar is 50  $\mu\text{m}$  (**b**). Average myotube diameter was measured  
 857 (n = 3) (**c**). **d**, OSMR levels in gastrocnemius muscle were determined by immunohistochemistry. **e-h**, Mice were  
 858 inoculated with LLC cells and sacrificed 16 days later (WT-LLC n = 5, other groups n = 6). Carcass weight without  
 859 the tumor mass (**e**) and tumor weight (**f**) were measured. Collected adipose tissues were weighed (**g**). Quadriceps  
 860 muscle mRNA levels were tested by RT-qPCR (WT-LLC n = 5, other groups n = 6) (**h**). The values are mean  $\pm$  SEM.  
 861 Statistical analysis was conducted using one-way ANOVA (**a,c**) and two-way ANOVA (**h**). \*\* $p < 0.01$ , \*\*\* $p < 0.001$   
 862 compared to the control group (**a,c**). # $p < 0.06$  compared to the OSM group (**c**). \*\* $p < 0.01$  compares differences

863 between WT and WT-LLC groups # $p < 0.05$  compares differences between WT-LLC and Myo-OSMR-KO-LLC  
864 groups (**h**).
